# Supplementary material for: Regioselective Suzuki–Miyaura reactions of 4,7-dichloro-N-methylisatin. Synthesis, anti-HIV activity and modeling study
Source: Royal Society of Chemistry journal article supplement (doi:10.1039/c5ra16841d), 2015-01-01
Supplement: c5ra16841d1.pdf [file c5ra16841d1.pdf]

## **Regioselective Suzuki-Miyaura Reactions of 4,7-Dichloro-*N*-methylisatin. Synthesis, Anti-HIV Activity and Modeling Study**

Aws M. Hamdy,<sup>a,b</sup> Najim A. Al-Masoudi,<sup>c</sup> Christophe Pannecouque,<sup>d</sup> Qamar Rahman,<sup>a,e</sup>  
Alexander Villinger,<sup>a</sup> Peter Langer\*<sup>a,f</sup>

### **Supporting Information**

Content

Copies of NMR spectra

p.2

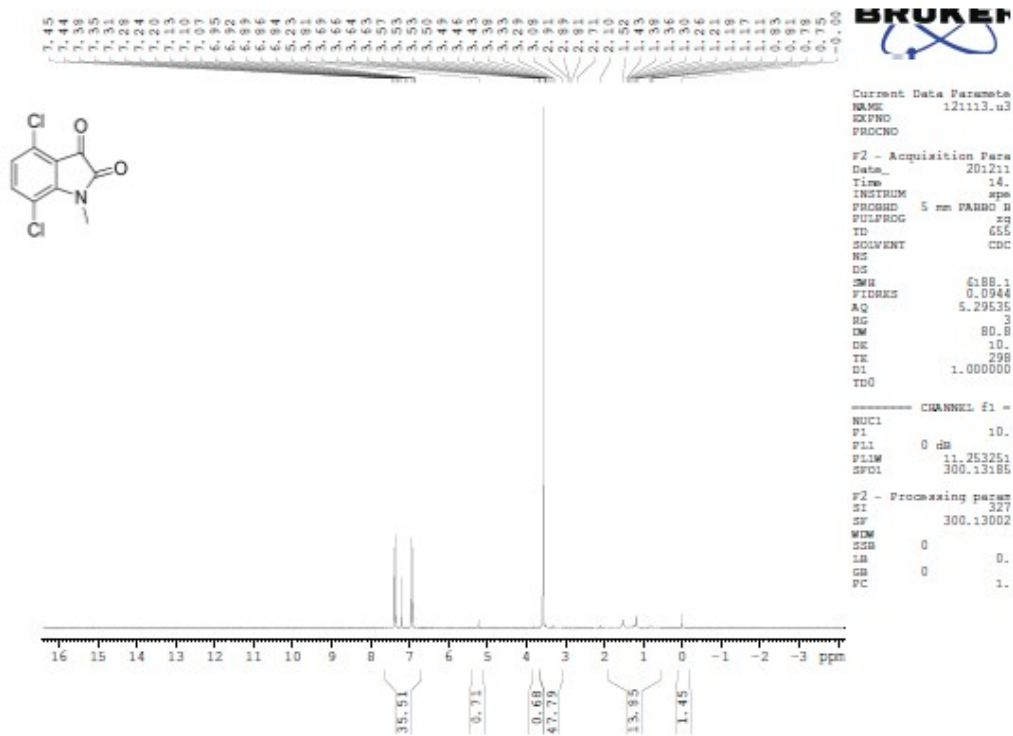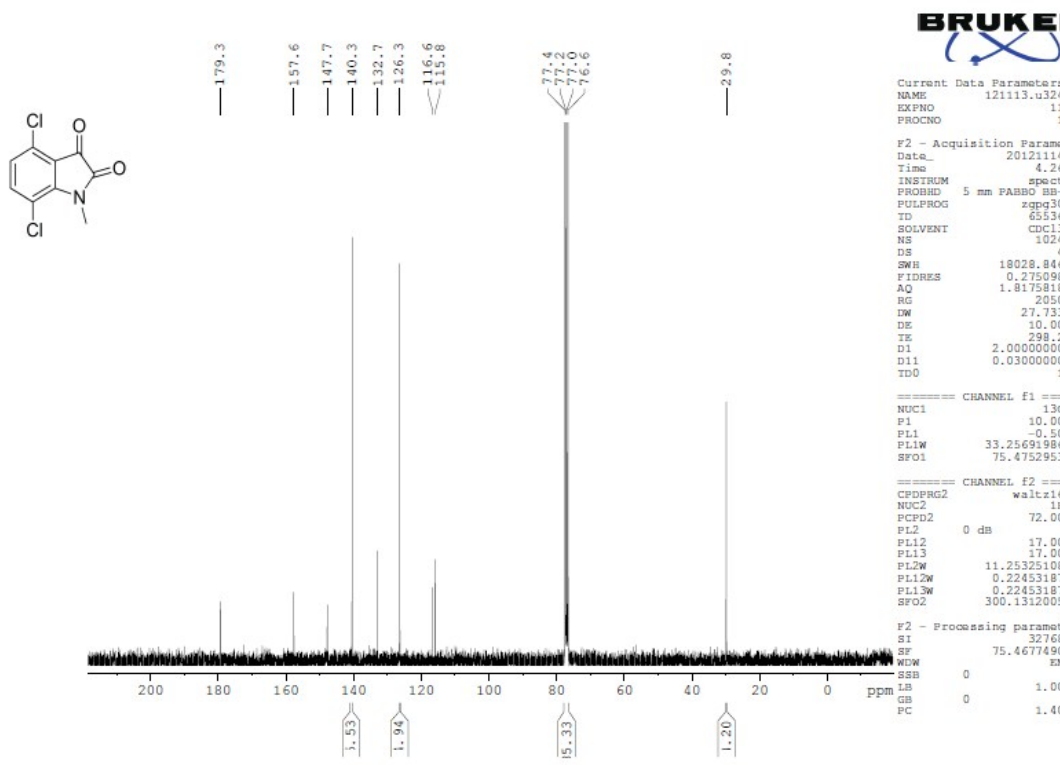

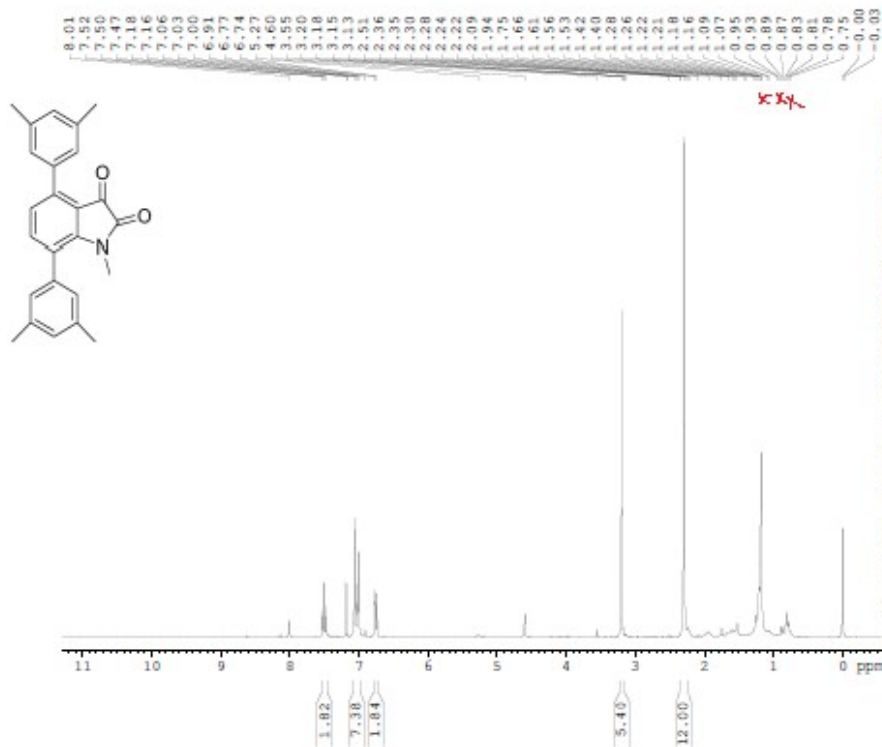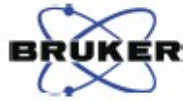

Current Data Parameters  
 NAME 131212.u306  
 EXPNO 10  
 PROCNO 1

F2 - Acquisition Parameters  
 Date\_ 20131212  
 Time 10.50  
 INSTRUM spect  
 PROBRD 5 mm PA100 BB-  
 PULPROG zg30  
 TD 65536  
 SOLVENT CDCl3  
 NS 16  
 DS 2  
 SWH 6188.119 Hz  
 FIDRES 0.09443 Hz  
 AQ 5.2953587 sec  
 RG 114  
 DW 80.800 usec  
 DE 10.00 usec  
 TE 298.2 K  
 DL 1.00000000 sec  
 TDO 1

CHANNEL F1  
 NUC1 1H  
 P1 10.00 usec  
 PL1 0 dB  
 PL1W 11.25325108 W  
 SFO1 300.1318534 MHz

F2 - Processing parameters  
 SI 32768  
 SF 300.1300346 MHz  
 WDW EM  
 SSB 0  
 LB 0.30 Hz  
 GB 0  
 PC 1.00

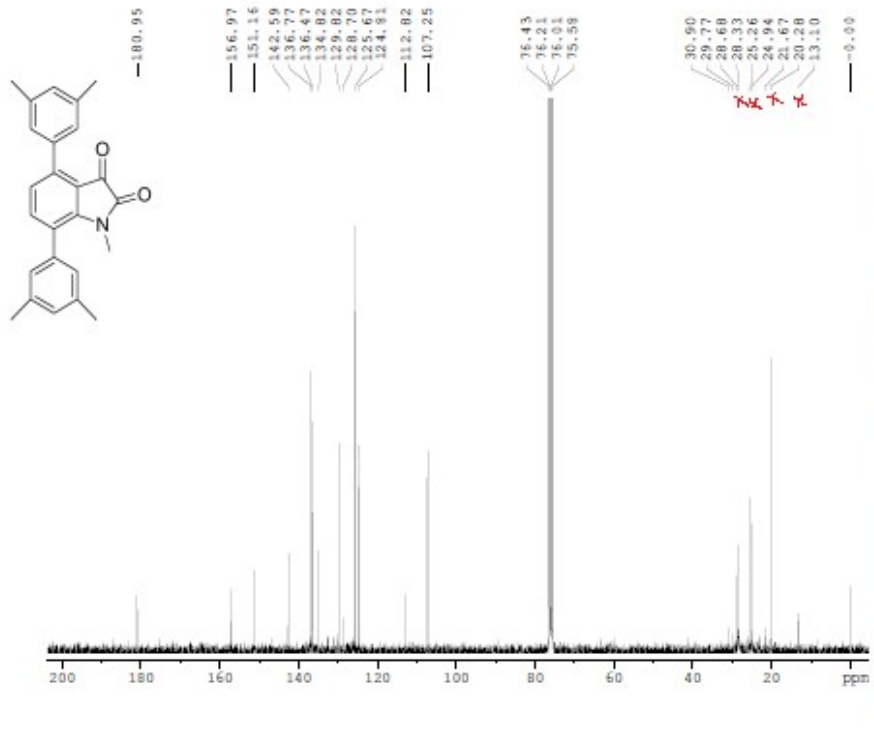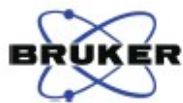

Current Data Parameters  
 NAME 131212.u306  
 EXPNO 11  
 PROCNO 1

F2 - Acquisition Parameters  
 Date\_ 20131212  
 Time 18.55  
 INSTRUM spect  
 PROBRD 5 mm PA100 BB-  
 PULPROG zgpg30  
 TD 65536  
 SOLVENT CDCl3  
 NS 4  
 DS 4  
 SWH 18028.846 Hz  
 FIDRES 0.275098 Hz  
 AQ 1.8175818 sec  
 RG 2050  
 DW 27.733 usec  
 DE 10.00 usec  
 TE 298.2 K  
 DL 2.00000000 sec  
 D11 0.03000000 sec  
 TDO 1

CHANNEL F1  
 NUC1 13C  
 P1 10.00 usec  
 PL1 -0.50 dB  
 PL1W 33.25691986 W  
 SFO1 75.4752953 MHz

CHANNEL F2  
 CPDPRG2 waltz16  
 NUC2 1H  
 PCPD2 72.00 usec  
 PL2 0 dB  
 PL12 17.00 dB  
 PL13 17.00 dB  
 PL2W 11.25325108 W  
 PL12W 0.22453187 W  
 PL13W 0.22453187 W  
 SFO2 300.1312005 MHz

F2 - Processing parameters  
 SI 32768  
 SF 75.4678276 MHz  
 WDW EM  
 SSB 0  
 LB 1.00 Hz  
 GB 0  
 PC 1.40

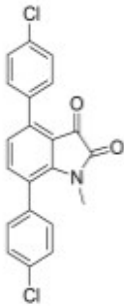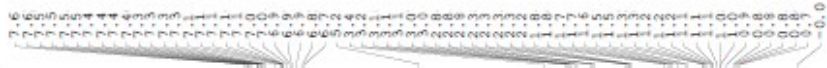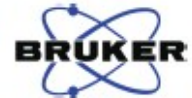

Current Data Parameters  
 NAME 131126.u311  
 KKFNO 10  
 PROCNO 1

F2 - Acquisition Parameters  
 Date\_ 20131126  
 Time 12.50  
 INSTRUM spect  
 PROBRD 5 mm PARBO SB-  
 PULPROG zg30  
 TD 65536  
 SOLVENT CDCl3  
 NS 16  
 DS 2  
 SWH 6188.119 Hz  
 FIDRES 0.094423 Hz  
 AQ 5.2953587 sec  
 RG 90.5  
 DM 80.800 usec  
 DE 10.00 usec  
 TE 298.2 K  
 D1 1.00000000 sec  
 TD0 1

CHANNEL F1  
 NUC1 1H  
 P1 10.00 usec  
 PL1 0 dB  
 PL1W 11.25325108 W  
 SFO1 300.1318534 MHz

F2 - Processing parameters  
 SI 32768  
 SF 300.1300331 MHz  
 MSW 3M  
 SSB 0  
 LB 0.30 Hz  
 GB 0  
 PC 1.00

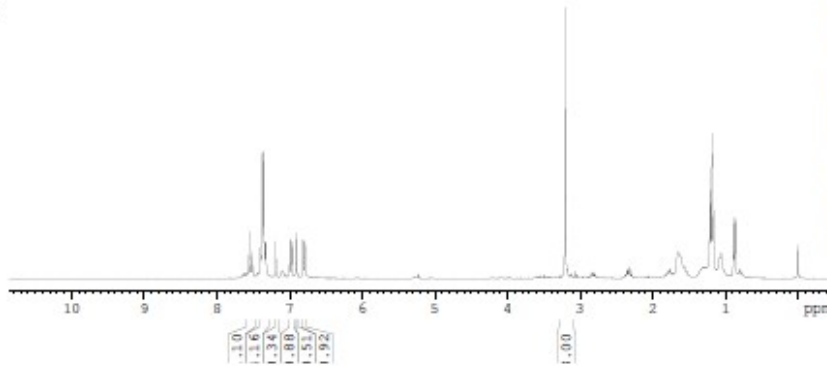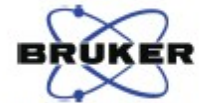

Current Data Parameters  
 NAME 131126.u311  
 KKFNO 11  
 PROCNO 1

F2 - Acquisition Parameters  
 Date\_ 20131127  
 Time 7.33  
 INSTRUM spect  
 PROBRD 5 mm PARBO SB-  
 PULPROG zgpg30  
 TD 65536  
 SOLVENT CDCl3  
 NS 1024  
 DS 4  
 SWH 18028.846 Hz  
 FIDRES 0.275098 Hz  
 AQ 1.8175818 sec  
 RG 2050  
 DM 27.733 usec  
 DE 10.00 usec  
 TE 298.2 K  
 D1 2.00000000 sec  
 D11 0.03000000 sec  
 TD0 1

CHANNEL F1  
 NUC1 13C  
 P1 10.00 usec  
 PL1 -0.50 dB  
 PL1W 33.25691986 W  
 SFO1 75.4752953 MHz

CHANNEL F2  
 CPDPRG2 waltz16  
 NUC2 1H  
 PCPD2 72.00 usec  
 PL2 0 dB  
 PL12 17.00 dB  
 PL13 17.00 dB  
 PL2W 11.25325108 W  
 PL12W 0.22453187 W  
 PL13W 0.22453187 W  
 SFO2 300.1312005 MHz

F2 - Processing parameters  
 SI 32768  
 SF 75.4678276 MHz  
 MSW 3M  
 SSB 0  
 LB 1.00 Hz  
 GB 0

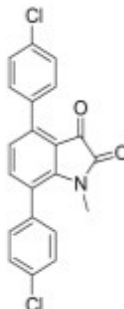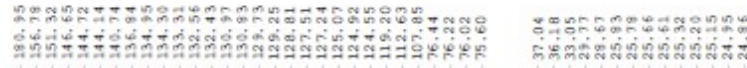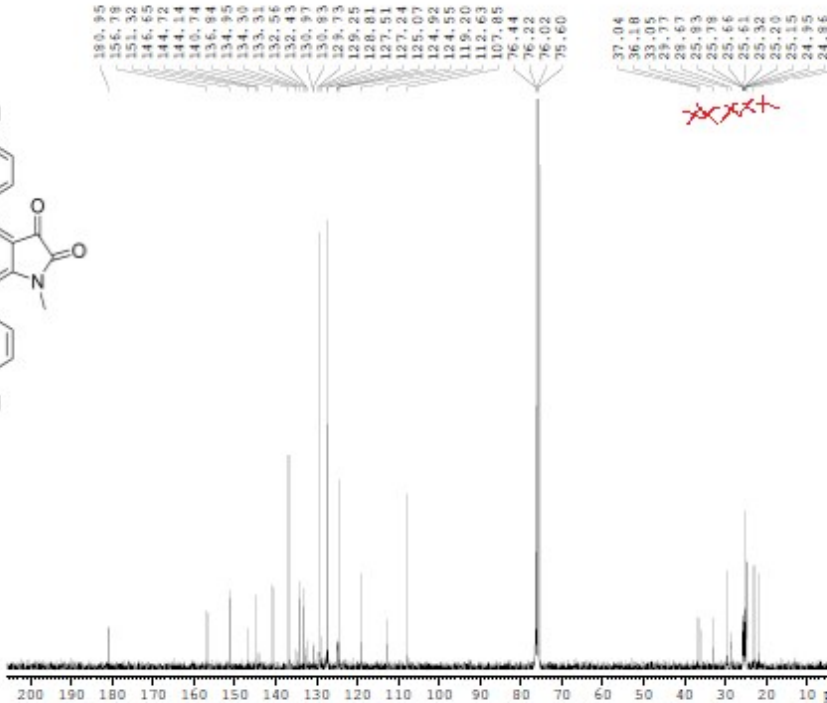

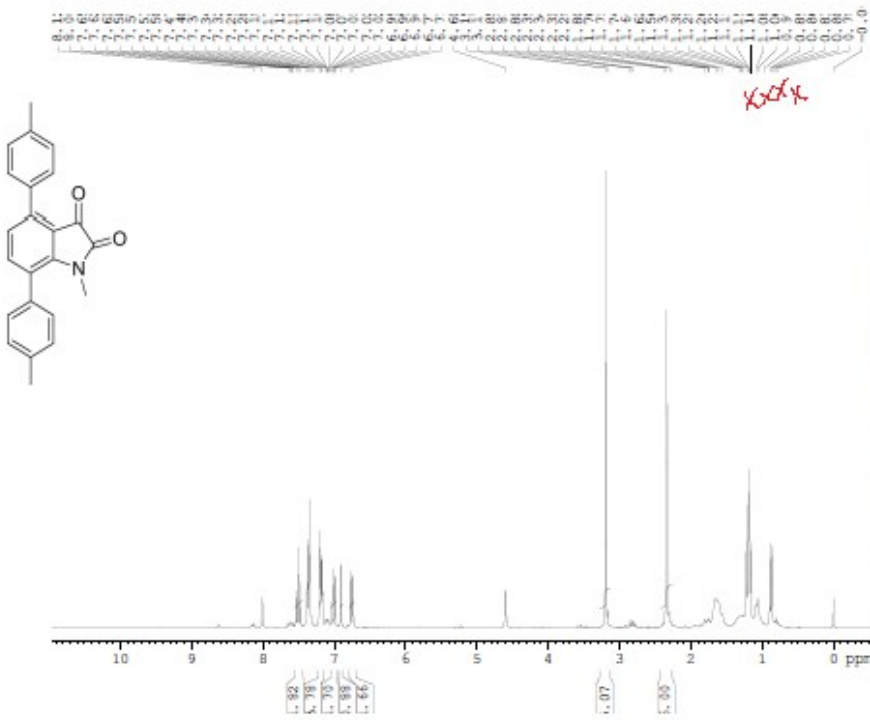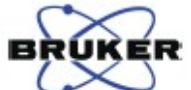

Current Data Parameters  
 NAME 131216.201  
 EXPNO 10  
 PROCNO 1

F2 - Acquisition Parameters  
 Date\_ 20131216  
 Time 10.55  
 INSTRUM spect  
 PROBHD 5 mm PABBO BB-  
 PULPROG zg30  
 TD 65536  
 SOLVENT CDC13  
 NS 16  
 DS 2  
 SWH 5165.289 Hz  
 FIDRES 0.078816 Hz  
 AQ 6.3439350 sec  
 RG 181  
 DW 96.800 usec  
 DE 10.00 usec  
 TE 298.2 K  
 D1 1.00000000 sec  
 TDO 1

==== CHANNEL f1 =====  
 NUC1 1H  
 P1 10.00 usec  
 PL1 -2.50 dB  
 SFO1 250.1315447 MHz

F2 - Processing parameters  
 SI 32768  
 SF 250.1300193 MHz  
 WDW EM  
 SSB 0  
 LB 0.30 Hz  
 GB 0  
 PC 1.00

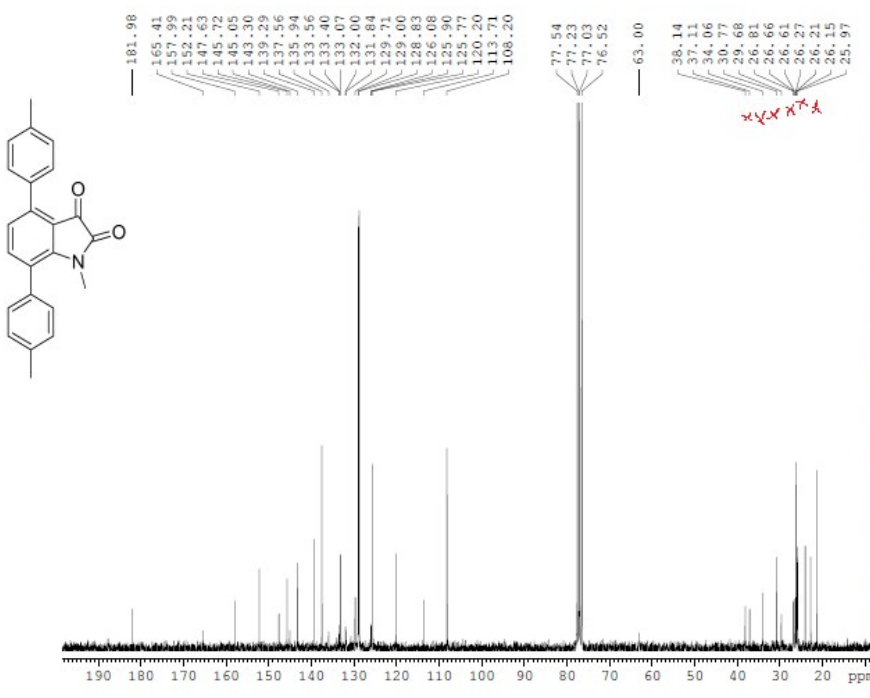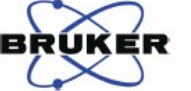

Current Data Parameters  
 NAME 131216.201  
 EXPNO 11  
 PROCNO 1

F2 - Acquisition Parameters  
 Date\_ 20131216  
 Time 12.09  
 INSTRUM spect  
 PROBHD 5 mm PABBO BB-  
 PULPROG zgpg30  
 TD 65536  
 SOLVENT CDC13  
 NS 1024  
 DS 4  
 SWH 15000.000 Hz  
 FIDRES 0.228882 Hz  
 AQ 2.1845834 sec  
 RG 2050  
 DW 33.333 usec  
 DE 10.00 usec  
 TE 298.0 K  
 D1 2.00000000 sec  
 d11 0.03000000 sec  
 DELTA 1.89999999 sec  
 TDO 1

==== CHANNEL f1 =====  
 NUC1 13C  
 P1 10.00 usec  
 PL1 -1.00 dB  
 SFO1 62.9015280 MHz

==== CHANNEL f2 =====  
 CDPHRG2 waltz16  
 NUC2 1H  
 PCPD2 70.00 usec  
 PL12 15.00 dB  
 PL13 15.00 dB  
 PL2 -2.50 dB  
 SFO2 250.1310005 MHz

F2 - Processing parameters  
 SI 32768  
 SF 62.8952390 MHz  
 WDW EM  
 SSB 0  
 LB 1.00 Hz  
 GB 0  
 PC 1.40

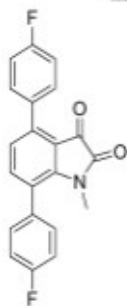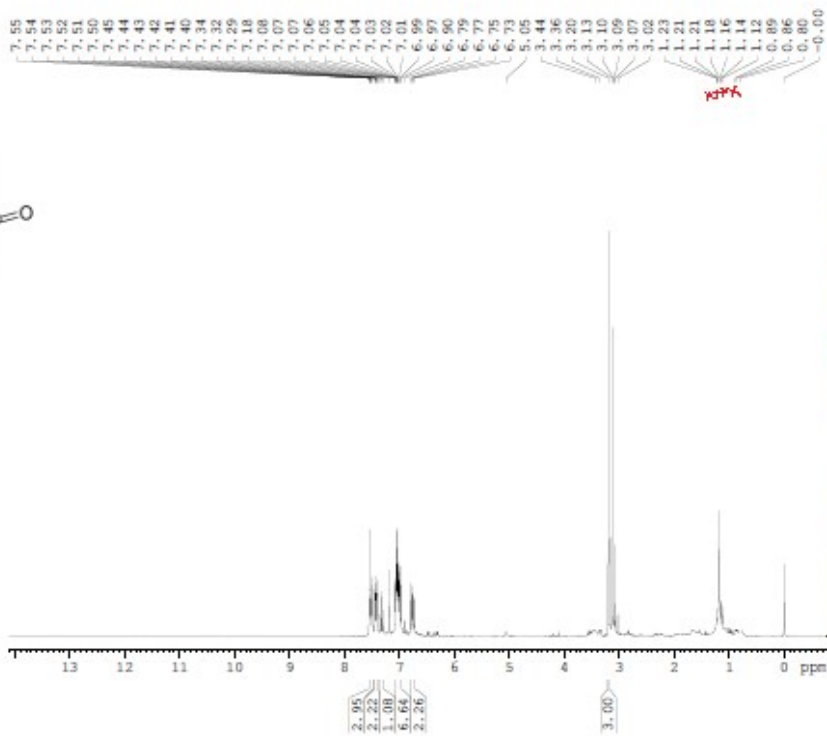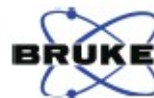

Current Data Parameter  
 NAME 131010.u3  
 EXPNO 1  
 PROCNO 1

F2 - Acquisition Param  
 Date\_ 201310  
 Time 10.1  
 INSTRUM ape  
 PROBRD 5 mm PABBO H  
 PULPROG zgpg3  
 TD 6553  
 SOLVENT CDCl  
 NS 140  
 DS 18028.84  
 SWH 18028.84  
 FIDRES 0.27509  
 AQ 1.817581  
 RG 205  
 DW 27.73  
 DE 10.0  
 TE 298.  
 D1 2.0000000  
 D11 0.0300000  
 TD0

==== CHANNEL f1 ====  
 NUC1  
 P1 10.0  
 PL1 0 db  
 PL1W 11.2532510  
 SFO1 300.13185

F2 - Processing param  
 SI 327  
 SF 300.13003  
 MW 75.475295  
 SSB 0  
 LB 0.0  
 GB 0  
 FC 1.4

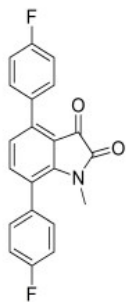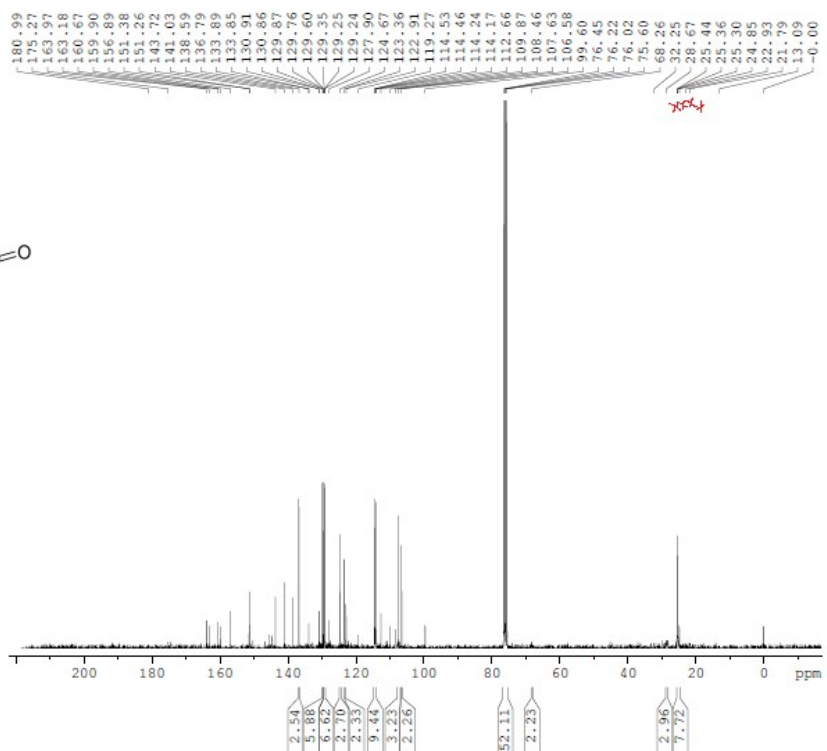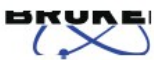

Current Data Parameter  
 NAME 131010.u30  
 EXPNO 1  
 PROCNO 1

F2 - Acquisition Param  
 Date\_ 201310  
 Time 10.5  
 INSTRUM spec  
 PROBRD 5 mm PABBO BB  
 PULPROG zgpg3  
 TD 6553  
 SOLVENT CDCl  
 NS 140  
 DS 18028.84  
 SWH 18028.84  
 FIDRES 0.27509  
 AQ 1.817581  
 RG 205  
 DW 27.73  
 DE 10.0  
 TE 298.  
 D1 2.0000000  
 D11 0.0300000  
 TD0

==== CHANNEL f1 ====  
 NUC1 13  
 P1 10.0  
 PL1 -0.5  
 PL1W 33.2569198  
 SFO1 75.475295

==== CHANNEL f2 ====  
 CPDPRG2 waltz1  
 NUC2 1  
 PCPD2 72.0  
 PL2  
 PL12 0 db  
 PL12 17.0  
 PL13 17.0  
 PL1W 11.2532510  
 PL12W 0.2245318  
 PL13W 0.2245318  
 SFO2 300.131200

F2 - Processing param  
 SI 3276  
 SF 75.467827  
 MW 75.475295  
 SSB 0  
 LB 1.0  
 GB 0  
 FC 1.4

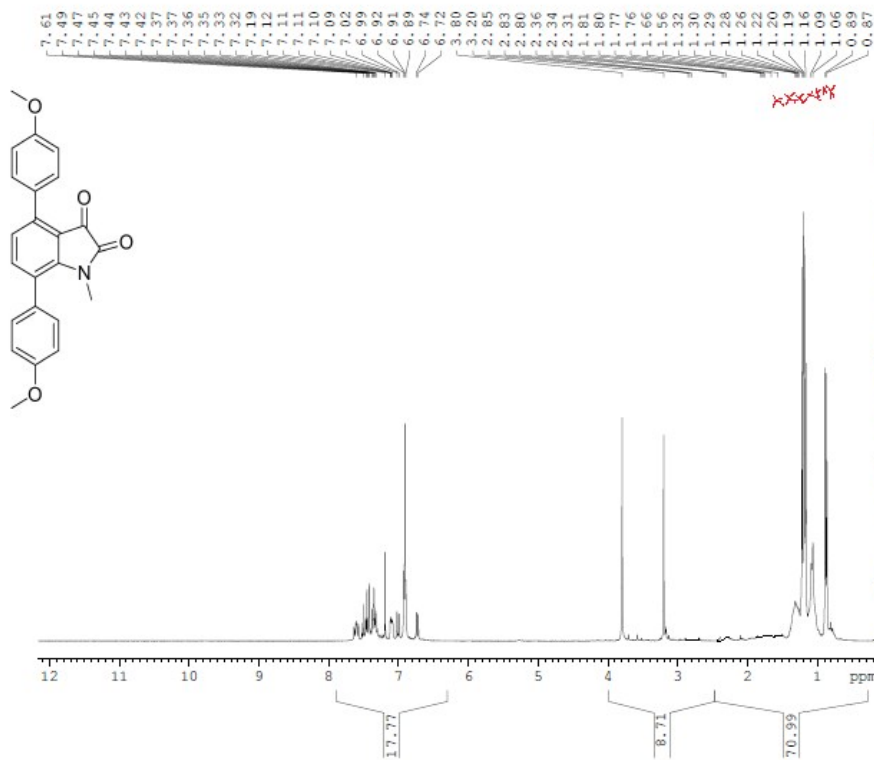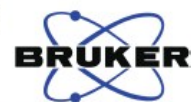

Current Data Parameters  
 NAME 130926.u325  
 EXPNO 10  
 PROCNO 1

F2 - Acquisition Parameters  
 Date\_ 20130926  
 Time 16.02  
 INSTRUM spect  
 PROBHD 5 mm PABBO BB-  
 PULPROG zg30  
 TD 65536  
 SOLVENT CDCl3  
 NS 16  
 DS 2  
 SWH 6188.119 Hz  
 FIDRES 0.094423 Hz  
 AQ 5.2953587 sec  
 RG 50.8  
 DW 80.800 usec  
 DE 10.00 usec  
 TE 298.2 K  
 D1 1.00000000 sec  
 TDO 1

==== CHANNEL f1 =====  
 NUC1 1H  
 P1 10.00 usec  
 PL1 0 dB  
 PL1W 11.25325108 W  
 SFO1 300.1318534 MHz

F2 - Processing parameters  
 SI 32768  
 SF 300.1300330 MHz  
 WDW EM  
 SSB 0  
 LB 0.30 Hz  
 GB 0  
 PC 1.00

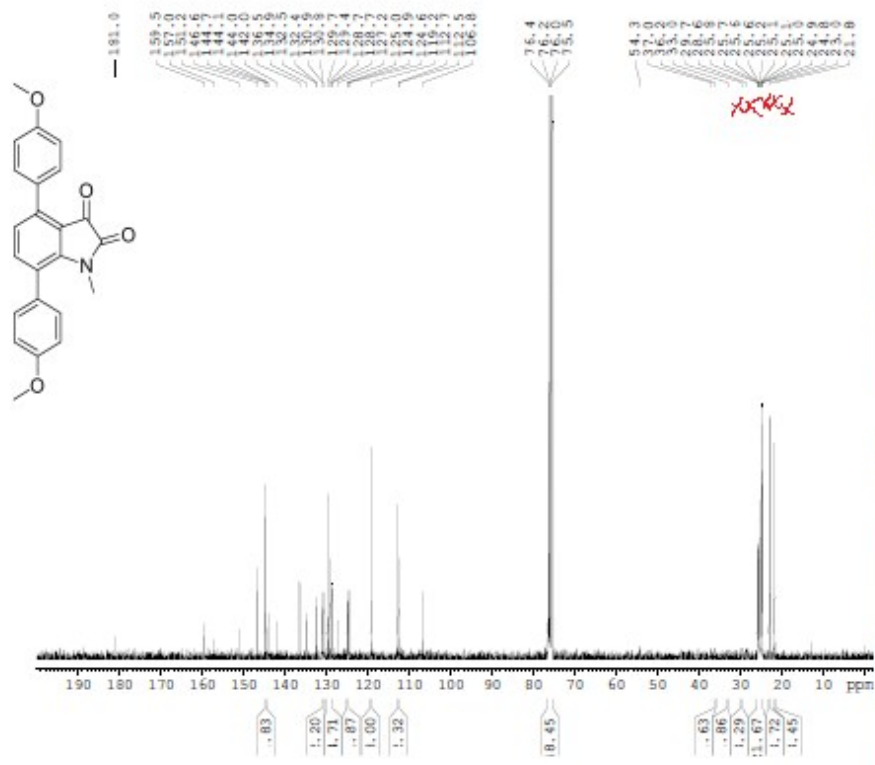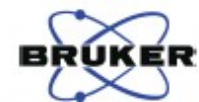

Current Data Parameters  
 NAME 130926.u325  
 EXPNO 11  
 PROCNO 1

F2 - Acquisition Parameters  
 Date\_ 20130926  
 Time 17.10  
 INSTRUM spect  
 PROBHD 5 mm PABBO BB-  
 PULPROG zgpg30  
 TD 65536  
 SOLVENT CDCl3  
 NS 1024  
 DS 4  
 SWH 18028.846 Hz  
 FIDRES 0.275098 Hz  
 AQ 1.8175813 sec  
 RG 2050  
 DW 27.733 usec  
 DE 10.00 usec  
 TE 298.2 K  
 D1 2.00000000 sec  
 D11 0.03000000 sec  
 TDO 1

==== CHANNEL f1 =====  
 NUC1 13C  
 P1 10.00 usec  
 PL1 -0.50 dB  
 PL1W 33.25691986 W  
 SFO1 75.4752953 MHz

==== CHANNEL f2 =====  
 CPDPRG2 waltz16  
 NUC2 1H  
 FCPD2 72.00 usec  
 FQ3 0 dB  
 FQ12 17.00 dB  
 FQ13 17.00 dB  
 PL2W 11.25325108 W  
 PL12W 0.22453187 W  
 PL13W 0.22453187 W  
 SFO2 300.1312005 MHz

F2 - Processing parameters  
 SI 32768  
 SF 75.4678274 MHz  
 WDW EM  
 SSB 0  
 LB 1.00 Hz  
 GB 0  
 PC 1.40

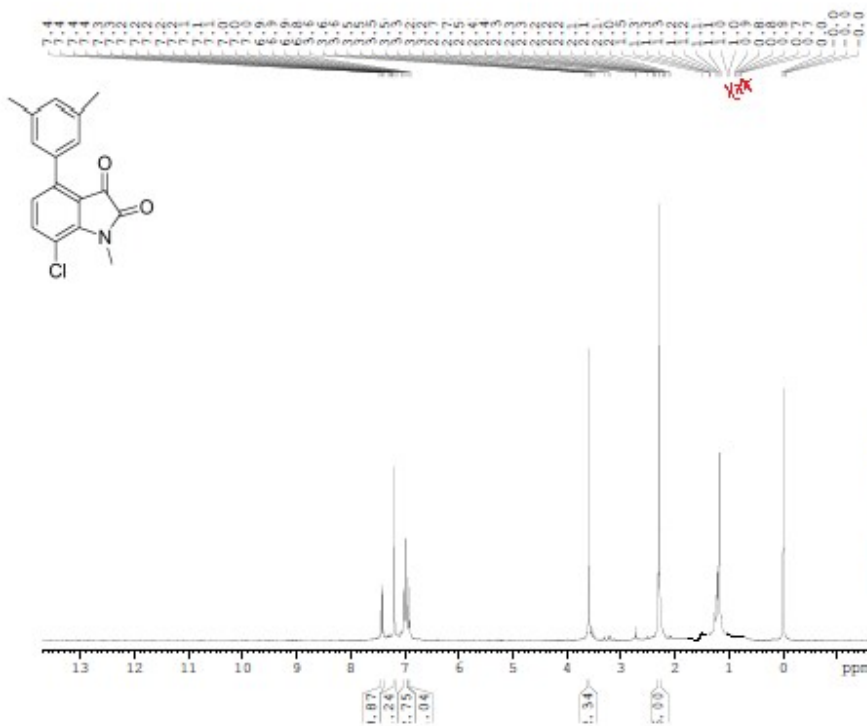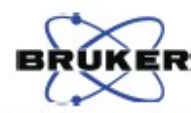

Current Data Parameters  
 NAME 131108.u324  
 EXPNO 10  
 PROCNO 1

F2 - Acquisition Parameters  
 Date\_ 20131108  
 Time 12.25  
 INSTRUM spect  
 PROBRD 5 mm PARBO BB-  
 PULPROG zg30  
 TD 65536  
 SOLVENT CDCl3  
 NS 16  
 DS 2  
 SWH 6188.119 Hz  
 FIDRES 0.094423 Hz  
 AQ 5.2953587 sec  
 RG 287  
 DM 80.800 usec  
 DE 10.00 usec  
 TE 298.2 K  
 D1 1.00000000 sec  
 TDO 1

CHANNEL F1  
 NUC1 1H  
 P1 10.00 usec  
 PL1 0 dB  
 PL1W 11.25325108 W  
 SFO1 300.1318534 MHz

F2 - Processing parameters  
 SI 32768  
 SF 300.1300350 MHz  
 WDW EM  
 SSB 0  
 LB 0.30 Hz  
 GB 0  
 PC 1.00

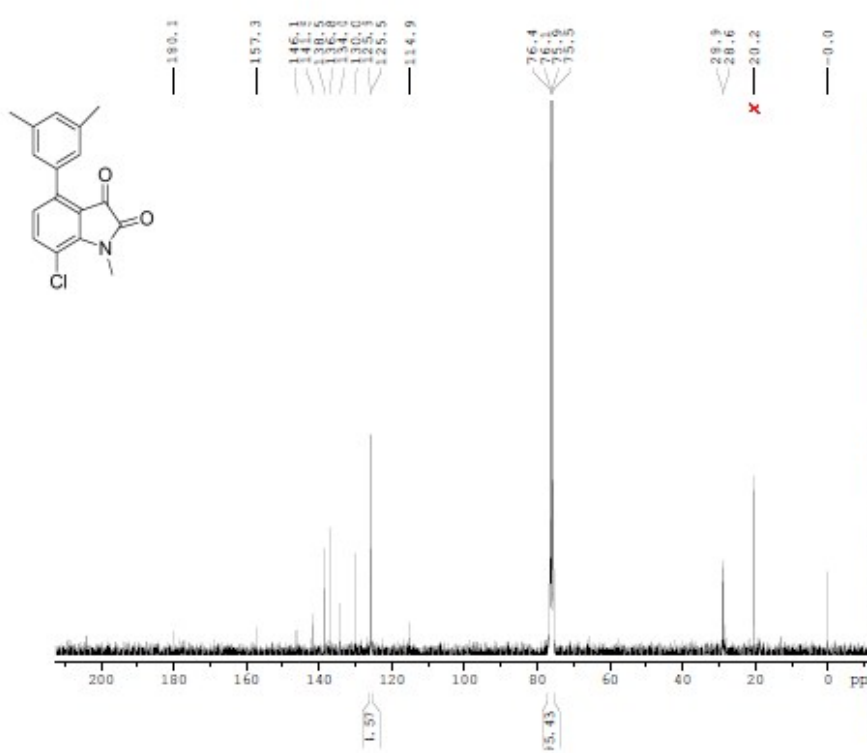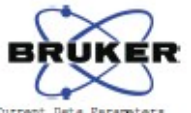

Current Data Parameters  
 NAME 131108.u324  
 EXPNO 12  
 PROCNO 1

F2 - Acquisition Parameters  
 Date\_ 20131109  
 Time 15.13  
 INSTRUM spect  
 PROBRD 5 mm PARBO BB-  
 PULPROG zgpg30  
 TD 65536  
 SOLVENT CDCl3  
 NS 2048  
 DS 4  
 SWH 18028.846 Hz  
 FIDRES 0.275098 Hz  
 AQ 1.8175818 sec  
 RG 2050  
 DM 27.733 usec  
 DE 10.00 usec  
 TE 298.2 K  
 D1 2.00000000 sec  
 D11 0.03000000 sec  
 TDO 1

CHANNEL F1  
 NUC1 13C  
 P1 10.00 usec  
 PL1 -0.50 dB  
 PL1W 33.25691986 W  
 SFO1 75.4752953 MHz

CHANNEL F2  
 CPDPRG2 waltz16  
 NUC2 1H  
 PCPD2 72.00 usec  
 PL2 0 dB  
 PL12 17.00 dB  
 PL13 17.00 dB  
 PL2W 11.25325108 W  
 PL12W 0.22453187 W  
 PL13W 0.22453187 W  
 SFO2 300.1312005 MHz

F2 - Processing parameters  
 SI 32768  
 SF 75.4678280 MHz  
 WDW EM  
 SSB 0  
 LB 1.00 Hz  
 GB 0  
 PC 1.40



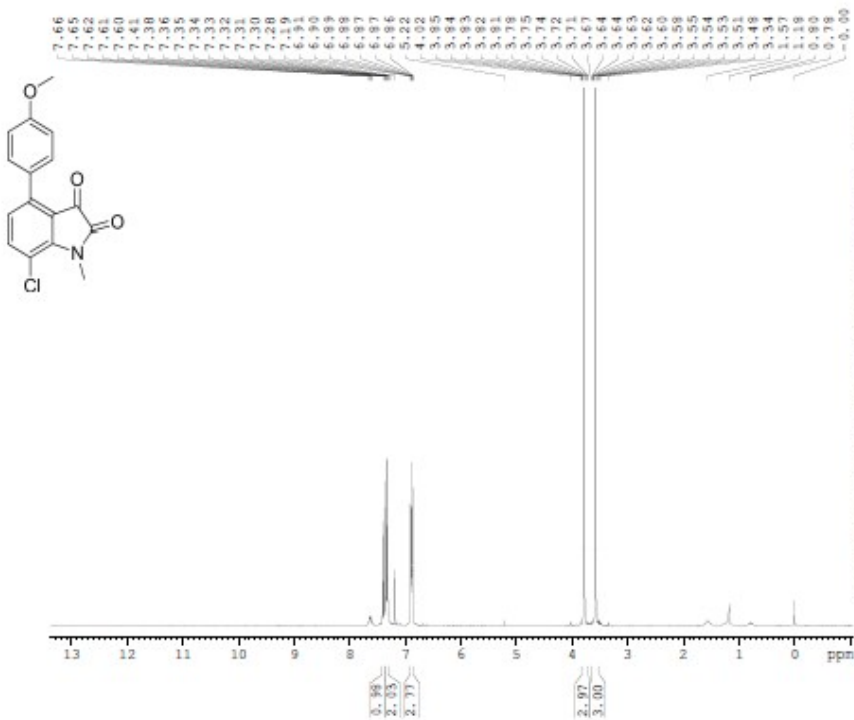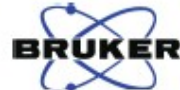

Current Data Parameters  
 NAME 131108.u325  
 EXPNO 10  
 PROCNO 1

F2 - Acquisition Parameters  
 Date\_ 20131108  
 Time 12.31  
 INSTRUM spect  
 PROBHD 5 mm PABBO BB-  
 PULPROG zg30  
 TD 65536  
 SOLVENT CDCl3  
 NS 16  
 DS 2  
 SWH 6188.119 Hz  
 FIDRES 0.094423 Hz  
 AQ 5.2953587 sec  
 RG 101  
 DM 80.800 usec  
 DE 10.00 usec  
 TE 298.2 K  
 D1 1.00000000 sec  
 TDD 1

CHANNEL f1  
 NUC1 1H  
 P1 10.00 usec  
 PL1 0 dB  
 PL1W 11.25325108 W  
 SFO1 300.1318534 MHz

F2 - Processing parameters  
 SI 32768  
 SF 300.1300329 MHz  
 WDW EM  
 SSB 0  
 LB 0.30 Hz  
 GB 0  
 PC 1.00

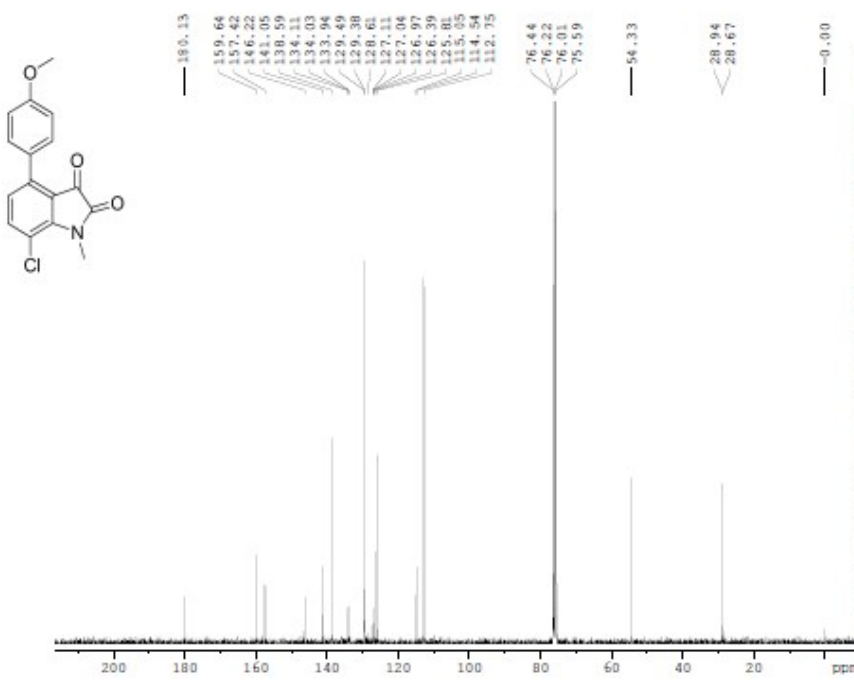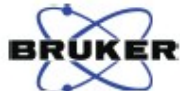

Current Data Parameters  
 NAME 131108.u325  
 EXPNO 12  
 PROCNO 1

F2 - Acquisition Parameters  
 Date\_ 20131109  
 Time 16.24  
 INSTRUM spect  
 PROBHD 5 mm PABBO BB-  
 PULPROG zgpg30  
 TD 65536  
 SOLVENT CDCl3  
 NS 1024  
 DS 4  
 SWH 18028.846 Hz  
 FIDRES 0.275099 Hz  
 AQ 1.8175818 sec  
 RG 2050  
 DM 27.733 usec  
 DE 10.00 usec  
 TE 298.2 K  
 D1 2.00000000 sec  
 D11 0.03000000 sec  
 TDD 1

CHANNEL f1  
 NUC1 13C  
 P1 10.00 usec  
 PL1 -0.50 dB  
 PL1W 33.25691986 W  
 SFO1 75.4752953 MHz

CHANNEL f2  
 CPDPRG2 waltz16  
 NUC2 1H  
 PCPD2 72.00 usec  
 PL2 0 dB  
 PL2 17.00 dB  
 PL3 17.00 dB  
 PL2W 11.25325108 W  
 PL3W 0.22452187 W  
 PL3W 0.22452187 W  
 SFO2 300.1312005 MHz

F2 - Processing parameters  
 SI 32768  
 SF 75.4676274 MHz  
 WDW EM  
 SSB 0  
 LB 1.00 Hz  
 GB 0  
 PC 1.00

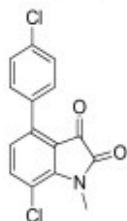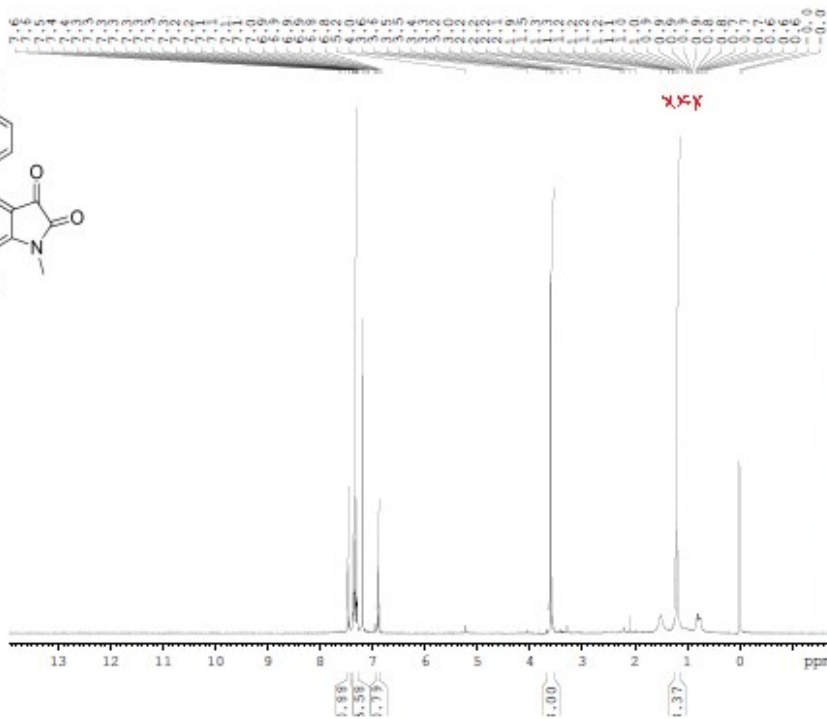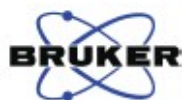

Current Data Parameters  
 NAME 131107.u306  
 EXPNO 10  
 PROCNO 1

F2 - Acquisition Parameters  
 Date\_ 20131107  
 Time 10.53  
 INSTRUM spect  
 PROBHD 5 mm PARHO BB-  
 PULPROG zg30  
 TD 65536  
 SOLVENT cnc13  
 NS 16  
 DS 2  
 SWH 6188.119 Hz  
 FIDRES 0.094423 Hz  
 AQ 5.2953587 sec  
 RG 406  
 DM 80.800 usec  
 DE 10.00 usec  
 TE 298.2 K  
 D1 1.00000000 sec  
 TD0 1

CHANNEL f1  
 NUC1 1H  
 P1 10.00 usec  
 PL1 0 dB  
 PL1W 11.25325108 W  
 SFO1 300.1318534 MHz

F2 - Processing parameters  
 SI 32768  
 SF 300.1300309 MHz  
 WDW EM  
 SSB 0  
 LB 0.30 Hz  
 GB 0  
 PC 1.00

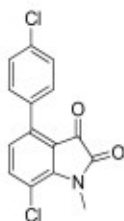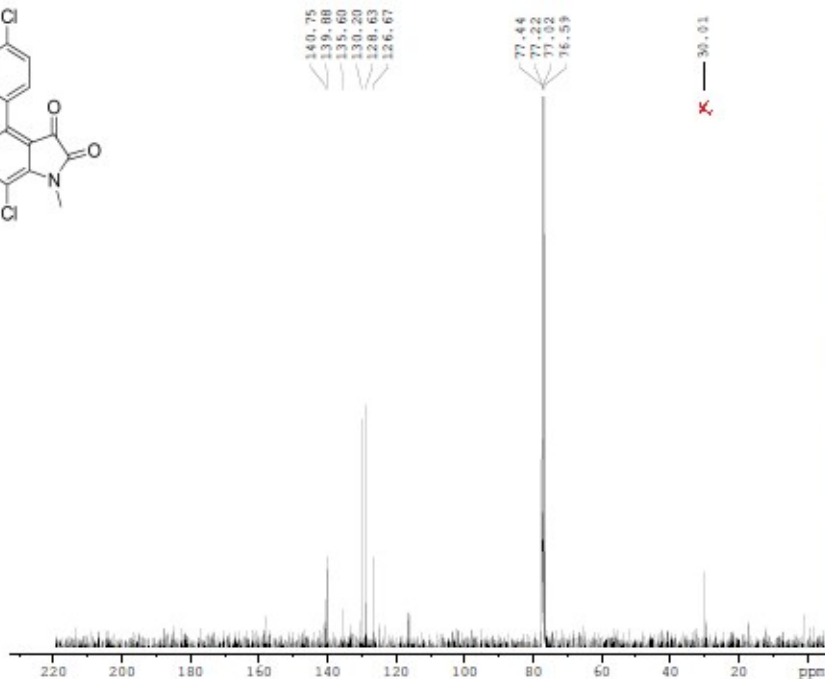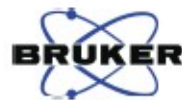

Current Data Parameters  
 NAME 131107.u306  
 EXPNO 12  
 PROCNO 1

F2 - Acquisition Parameters  
 Date\_ 20131107  
 Time 12.36  
 INSTRUM spect  
 PROBHD 5 mm PARHO BB-  
 PULPROG zgpg30  
 TD 65536  
 SOLVENT CDC13  
 NS 1024  
 DS 4  
 SWH 18028.846 Hz  
 FIDRES 0.275098 Hz  
 AQ 1.0175818 sec  
 RG 2058  
 DM 21.733 usec  
 DE 10.00 usec  
 TE 298.2 K  
 D1 2.00000000 sec  
 D11 0.03000000 sec  
 TD0 1

CHANNEL f1  
 NUC1 13C  
 P1 10.00 usec  
 PL1 -0.50 dB  
 PL1W 33.25691984 W  
 SFO1 75.4752953 MHz

CHANNEL f2  
 CPDPRG2 waltz16  
 NUC2 1H  
 PCPD2 72.00 usec  
 PL2 0 dB  
 PL12 17.00 dB  
 PL13 17.00 dB  
 PL2W 11.25325108 W  
 PL12W 0.22453187 W  
 PL13W 0.22453187 W  
 SFO2 300.1312005 MHz

F2 - Processing parameters  
 SI 32768  
 SF 75.4677490 MHz  
 WDW EM  
 SSB 0  
 LB 1.00 Hz  
 GB 0  
 PC 1.40

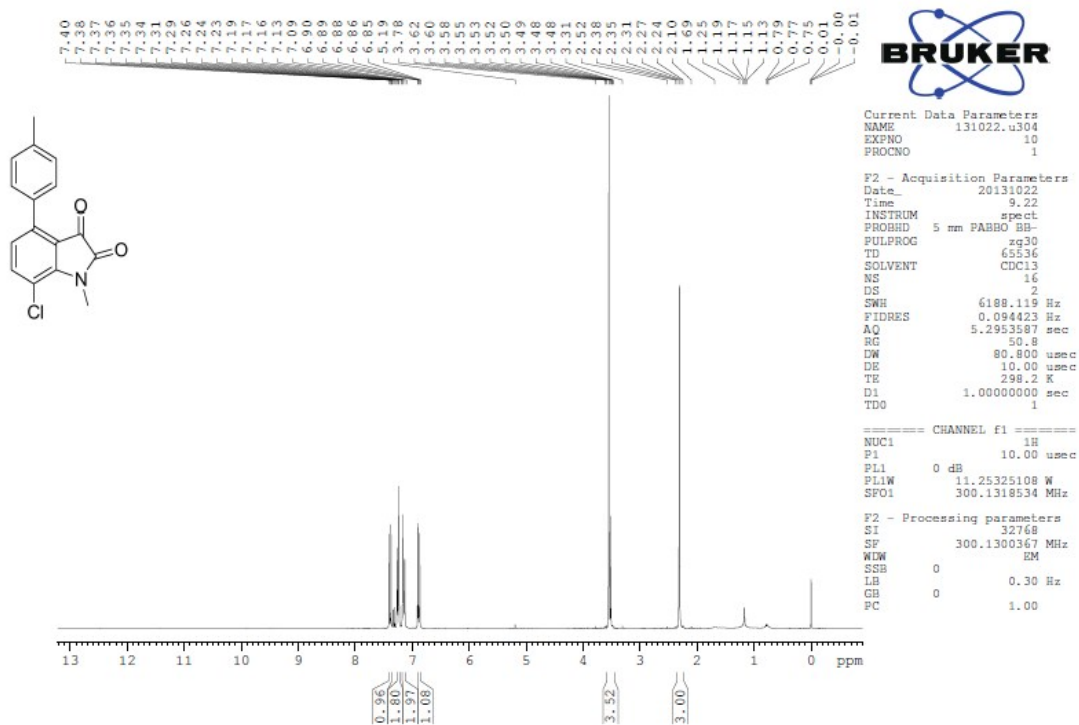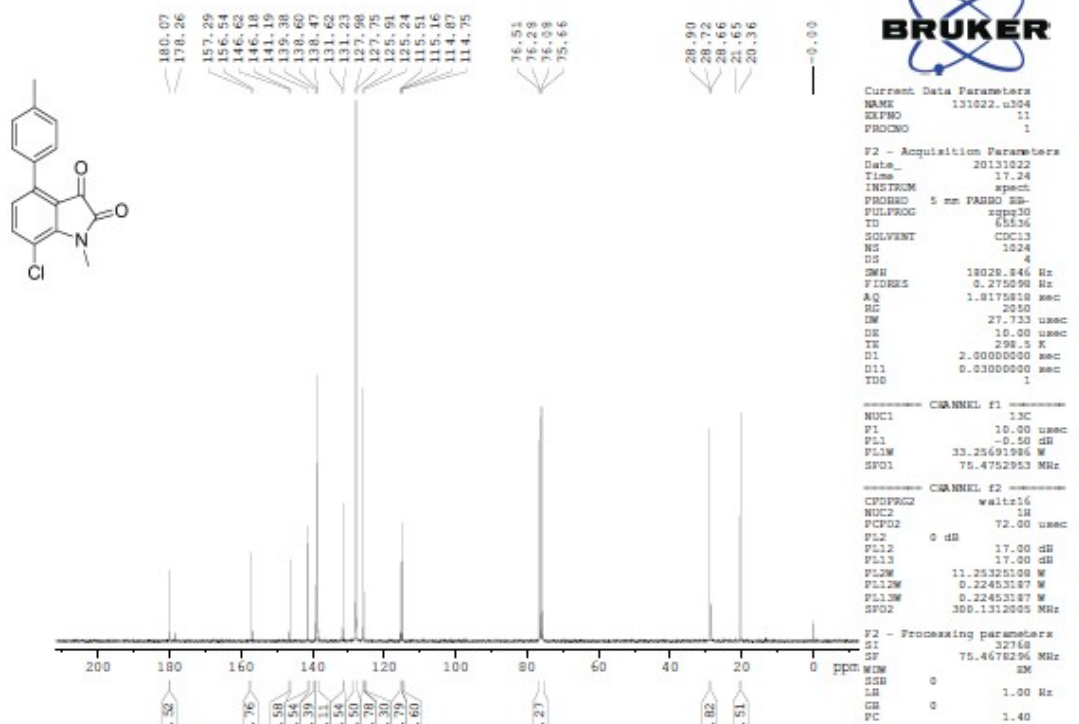



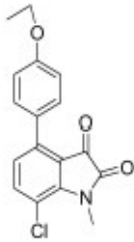

DRUGS

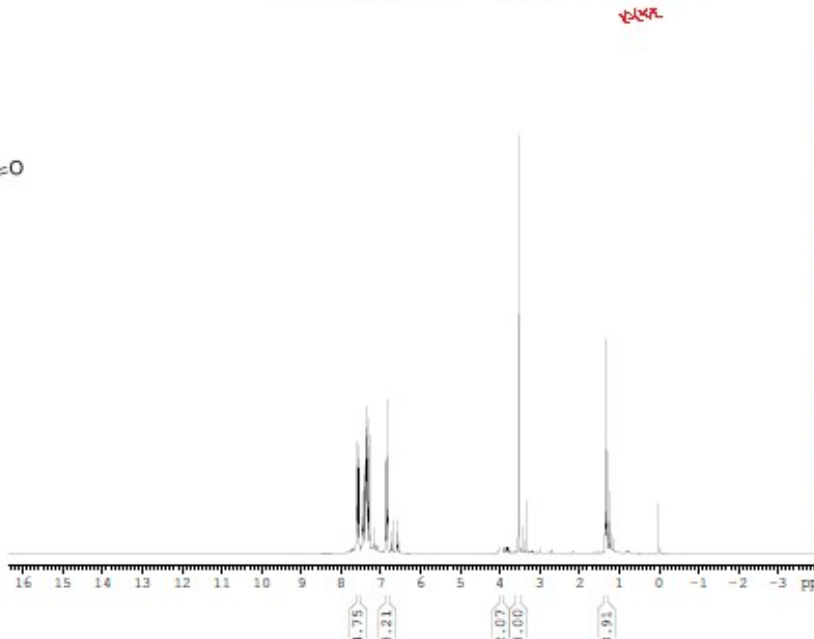

Current Data Parameters  
 NAME 131021.u  
 EXPNO 1  
 PROCNO 1

F2 - Acquisition Parameters  
 Date\_ 201311  
 Time 9  
 INSTRUM spt  
 PROBHD 5 mm FASBO 1  
 PULPROG zgpg30  
 TD 651  
 SOLVENT CDCl3  
 NS 1024  
 DS 4  
 SFR 6.881  
 FIDRES 0.094  
 AQ 5.29531  
 RG 327.68  
 SW 10.1  
 DK 291  
 TE 291  
 D1 1.00000  
 TDD

CHANNEL f1 -  
 NUCL1 13C  
 P1 10.00  
 PL1 0 dB  
 PLW 11.25325  
 SFO1 300.13181

F2 - Processing parameters  
 SI 32768  
 SF 300.13000  
 MWM 0  
 SSR 0  
 LB 0  
 GB 0  
 PC 1

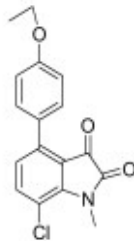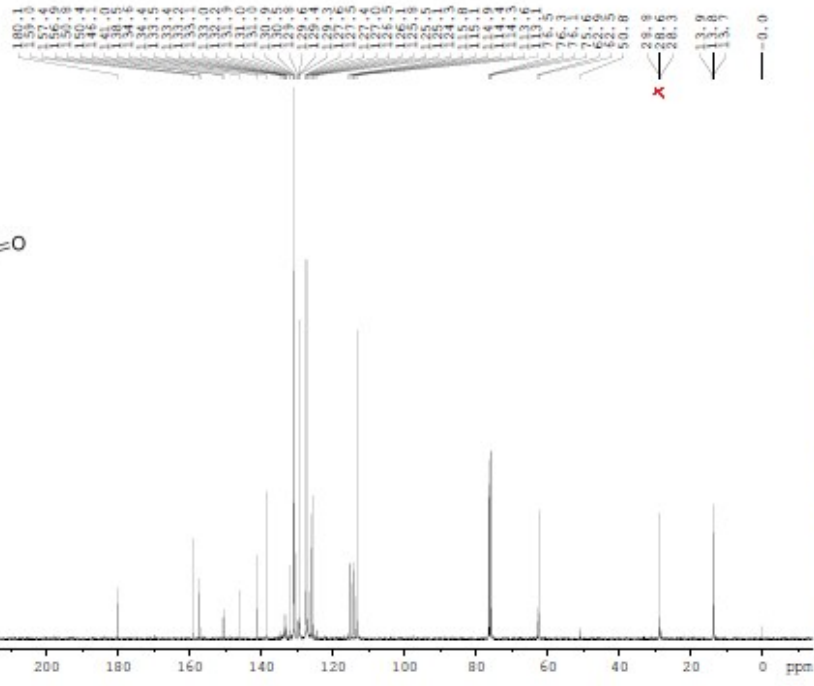

DRUGS

Current Data Parameters  
 NAME 131021.u3  
 EXPNO 1  
 PROCNO 1

F2 - Acquisition Parameters  
 Date\_ 2013102  
 Time 12.2  
 INSTRUM spt  
 PROBHD 5 mm FASBO 15  
 PULPROG zgpg30  
 TD 655  
 SOLVENT CDCl3  
 NS 1024  
 DS 4  
 SFR 18028.84  
 FIDRES 0.27501  
 AQ 1.917581  
 RG 327.68  
 SW 10.1  
 DK 291  
 TE 291  
 D1 2.0000000  
 D11 0.0300000  
 TDD

CHANNEL f1 -  
 NUCL1 13C  
 P1 10.00  
 PL1 0 dB  
 PLW 33.2569196  
 SFO1 75.475295

CHANNEL f2 -  
 CPDPRG2 waltz16  
 NUCL2 1H  
 P2PFG2 72.0  
 PL2 0 dB  
 PL12 17.0  
 PL13 17.0  
 PLW 11.2532510  
 PL12W 0.2245316  
 PL13W 0.2245316  
 SFO2 300.131200

F2 - Processing parameters  
 SI 32768  
 SF 75.467825  
 MWM 0  
 SSR 0  
 LB 0  
 GB 0  
 PC 1.4

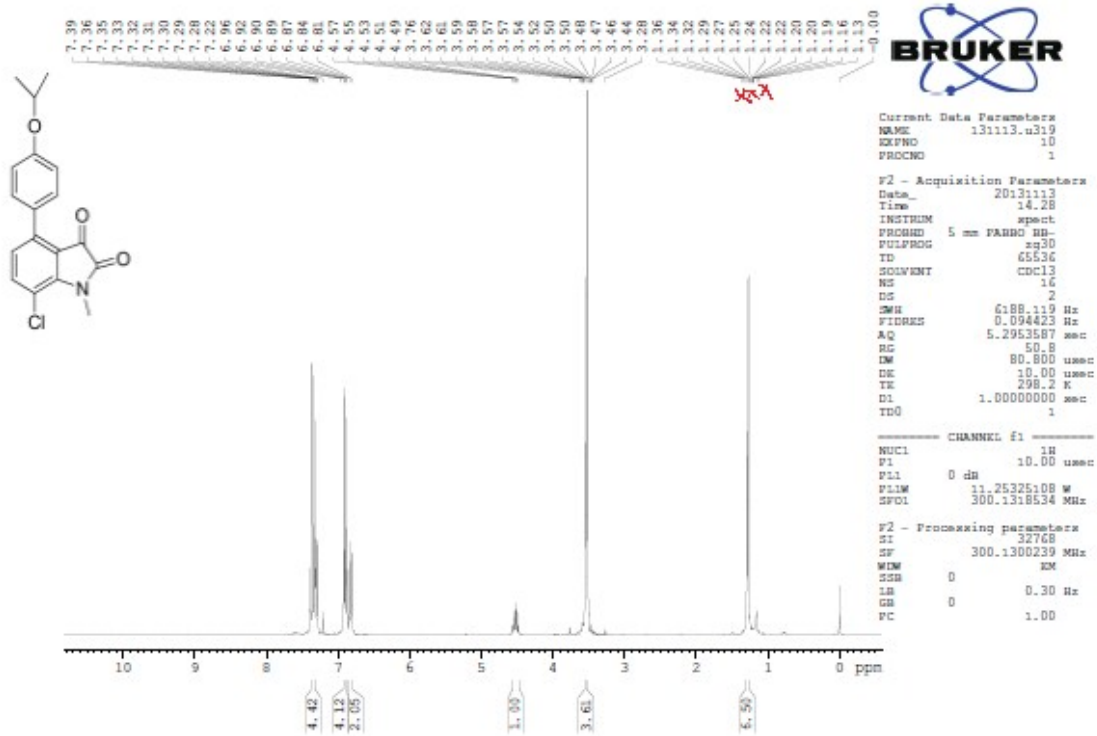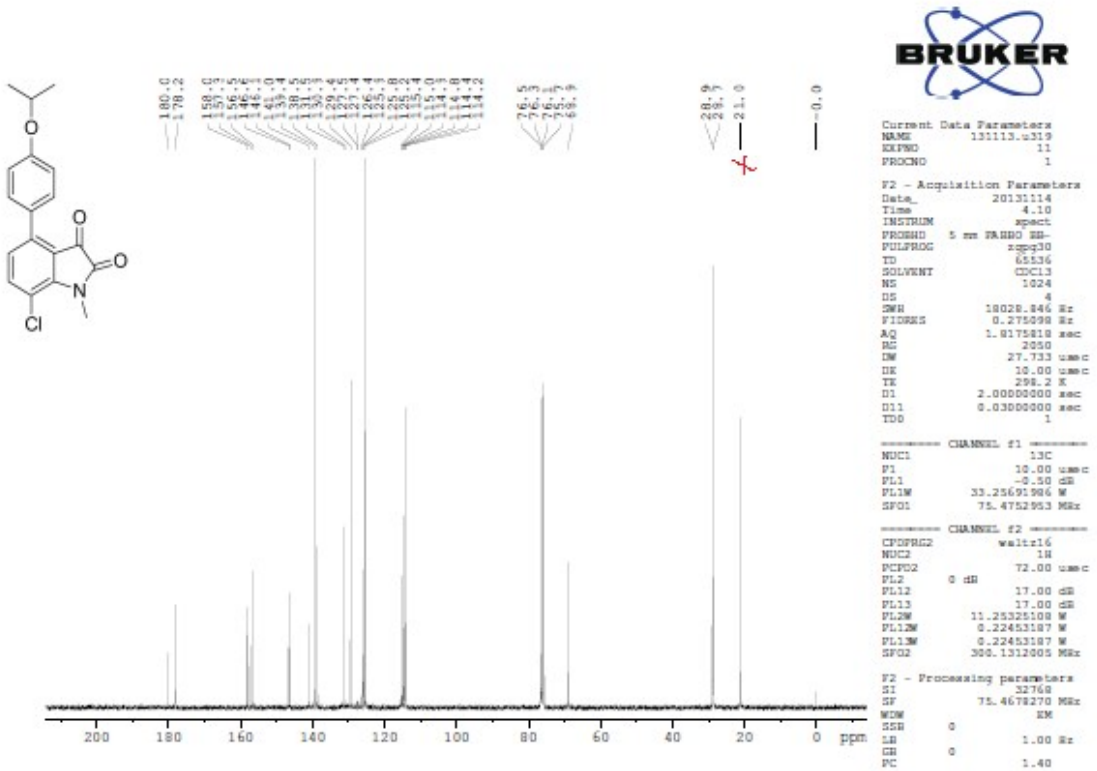

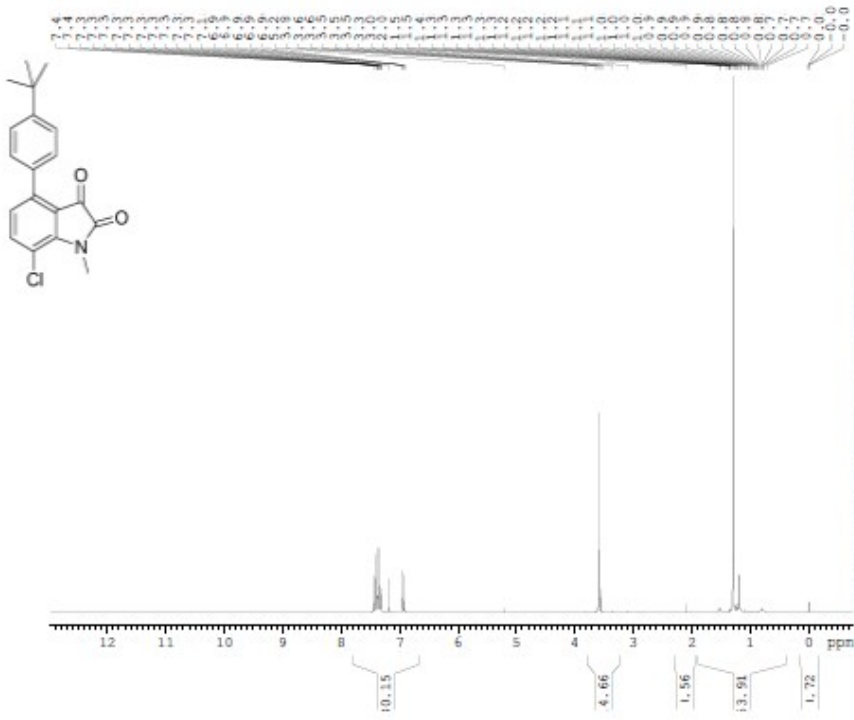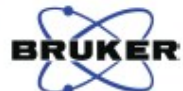

Current Data Parameters  
 NAME 120427.u301  
 EXPNO 10  
 PROCNO 1

F2 - Acquisition Parameters  
 Date\_ 20120427  
 Time 8.42  
 INSTRUM spect  
 PROBHD 5 mm PABBO BB-  
 PULPROG zgpg30  
 TD 65536  
 SOLVENT CDCl3  
 NS 16  
 DS 2  
 SWH 6188.119 Hz  
 FIDRES 0.094423 Hz  
 AQ 5.2953587 sec  
 RG 90.5  
 DM 80.800 usec  
 DE 10.00 usec  
 TE 298.2 K  
 D1 1.00000000 sec  
 TD0 1

CHANNEL f1  
 NUC1 1H  
 P1 10.00 usec  
 PL1 0 dB  
 PL1W 11.25325108 W  
 SFO1 300.1318534 MHz

F2 - Processing parameters  
 SI 32768  
 SF 300.1300313 MHz  
 WDM KM  
 SSB 0  
 LB 0.30 Hz  
 GB 0  
 PC 1.00

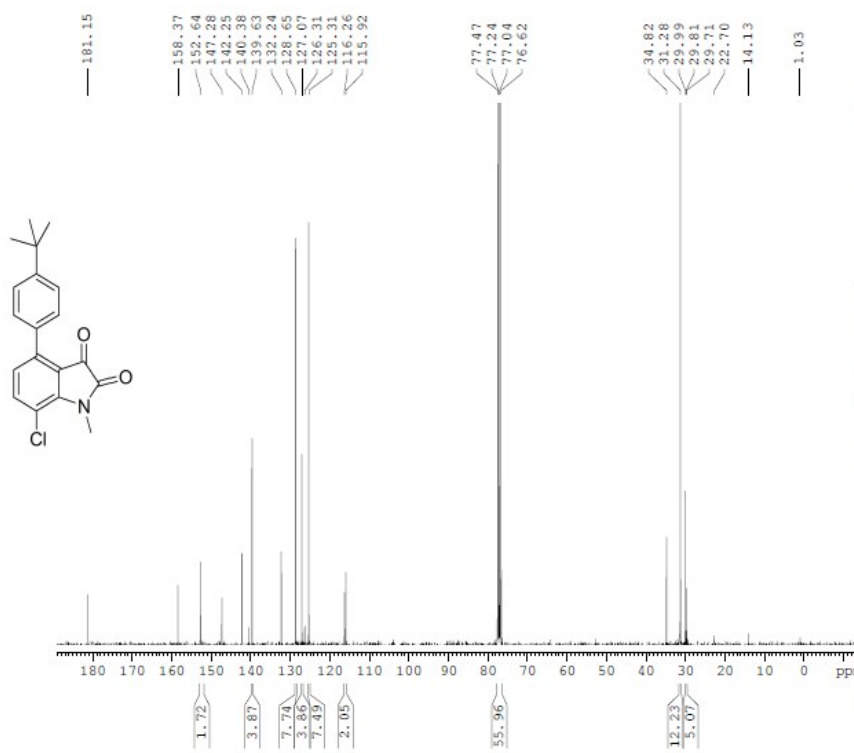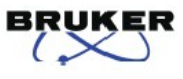

Current Data Parameters  
 NAME 120427.u301  
 EXPNO 11  
 PROCNO 1

F2 - Acquisition Parameters  
 Date\_ 20120428  
 Time 3.48  
 INSTRUM spect  
 PROBHD 5 mm PABBO BB-  
 PULPROG zgpg30  
 TD 65536  
 SOLVENT CDCl3  
 NS 1024  
 DS 4  
 SWH 18028.846 Hz  
 FIDRES 0.275098 Hz  
 AQ 1.8175818 sec  
 RG 2050  
 DM 27.733 usec  
 DE 10.00 usec  
 TE 298.2 K  
 D1 2.00000000 sec  
 D11 0.03000000 sec  
 TD0 1

CHANNEL f1  
 NUC1 13C  
 P1 10.00 usec  
 PL1 -0.50 dB  
 PL1W 33.25691986 W  
 SFO1 75.4752953 MHz

CHANNEL f2  
 CPDPRG2 waltz16  
 NUC2 1H  
 PCPD2 72.00 usec  
 PL2 0 dB  
 PL12 17.00 dB  
 PL13 17.00 dB  
 PL2W 11.25325108 W  
 PL12W 0.22453187 W  
 PL13W 0.22453187 W  
 SFO2 300.1312005 MHz

F2 - Processing parameters  
 SI 32768  
 SF 75.4677490 MHz  
 WDM KM  
 SSB 0  
 LB 1.00 Hz  
 GB 0  
 PC 1.40

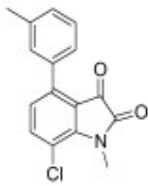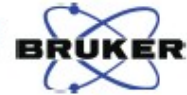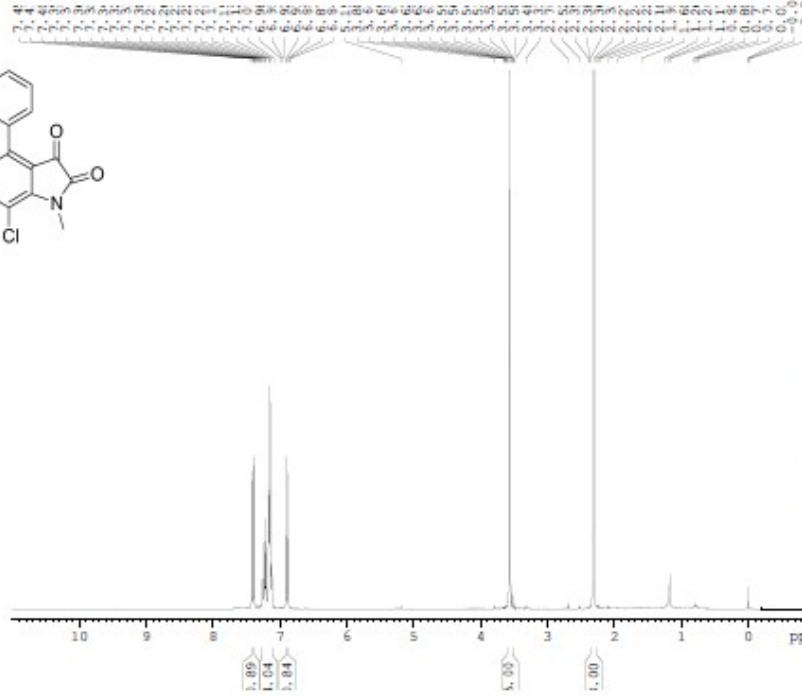

Current Data Parameters  
 NAME 131114.u305  
 EXPNO 10  
 PROCNO 1  
 F2 - Acquisition Parameters  
 Date\_ 20131114  
 Time 9.42  
 INSTRUM spect  
 PROBRD 5 mm PABBO BB-  
 PULPROG zgpg30  
 TD 65536  
 SOLVENT CDCl3  
 NS 16  
 DS 2  
 SFR 6188.119 Hz  
 FIDRES 0.094423 Hz  
 AQ 5.2953587 sec  
 RG 50.8  
 DM 80.800 usec  
 DE 10.00 usec  
 TK 298.2 K  
 D1 1.00000000 sec  
 TDO 1

CHANNEL f1  
 NUC1 1H  
 P1 10.00 usec  
 PL1 0 dB  
 PL1W 11.25325108 W  
 SFO1 300.1318534 MHz  
 F2 - Processing parameters  
 SI 32768  
 SF 300.1300382 MHz  
 WDM 0  
 SSB 0 0.30 Hz  
 GB 0  
 PC 1.00

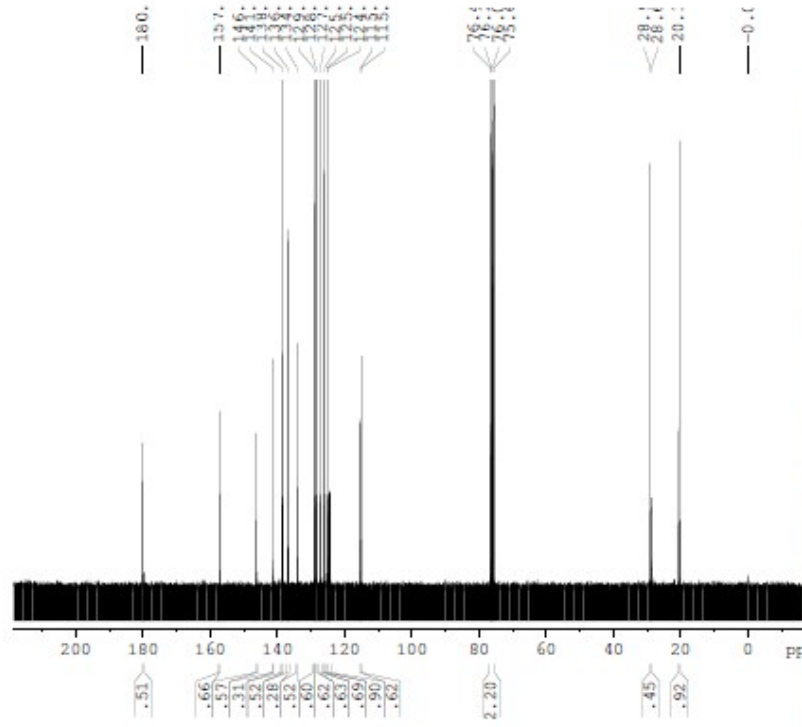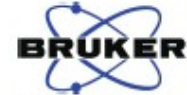

Current Data Parameters  
 NAME 131114.u305  
 EXPNO 11  
 PROCNO 1  
 F2 - Acquisition Parameters  
 Date\_ 20131114  
 Time 21.37  
 INSTRUM spect  
 PROBRD 5 mm PABBO BB-  
 PULPROG zgpg30  
 TD 65536  
 SOLVENT CDCl3  
 NS 1024  
 DS 4  
 SFR 18028.846 Hz  
 FIDRES 0.275090 Hz  
 AQ 1.8175818 sec  
 RG 2050  
 DM 27.733 usec  
 DE 10.00 usec  
 TK 298.2 K  
 D1 2.00000000 sec  
 D11 0.03000000 sec  
 TDO 1

CHANNEL f1  
 NUC1 13C  
 P1 10.00 usec  
 PL1 -0.50 dB  
 PL1W 33.25691986 W  
 SFO1 75.4752953 MHz

CHANNEL f2  
 CPDPRG2 waltz16  
 NUC2 1H  
 PCPD2 72.00 usec  
 PL2 0 dB  
 PL12 17.00 dB  
 PL13 17.00 dB  
 PL2W 11.25325108 W  
 PL12W 0.22453187 W  
 PL13W 0.22453187 W  
 SFO2 300.1312005 MHz

F2 - Processing parameters  
 SI 32768  
 SF 75.4678295 MHz  
 WDM 0  
 SSB 0 1.00 Hz  
 GB 0  
 PC 1.40



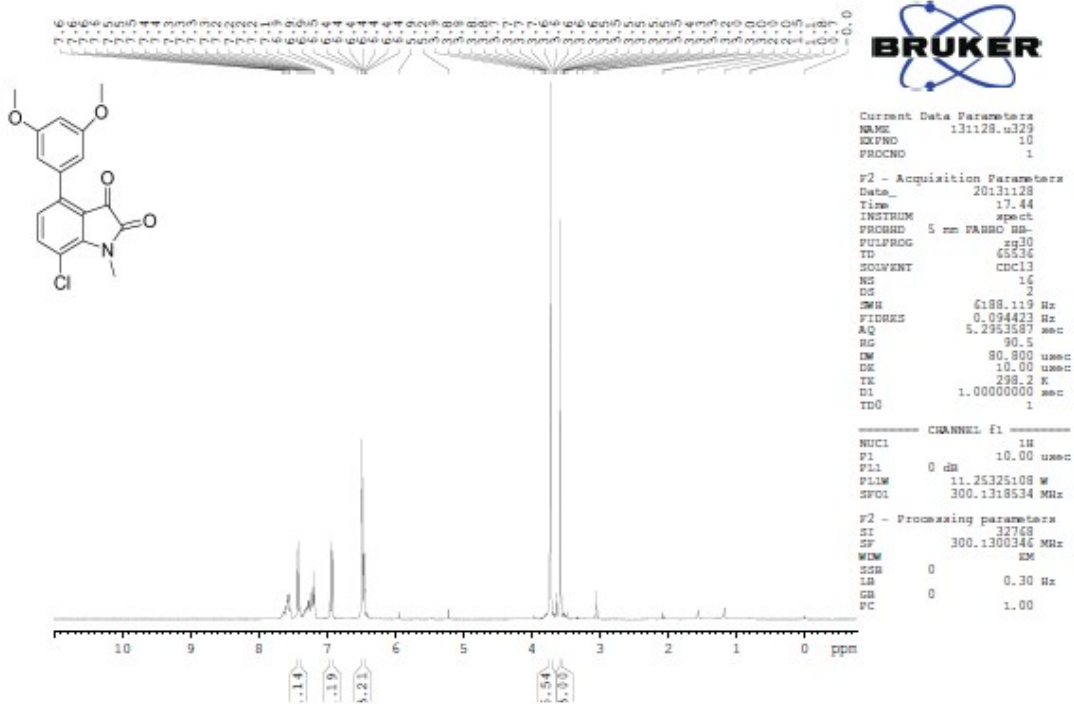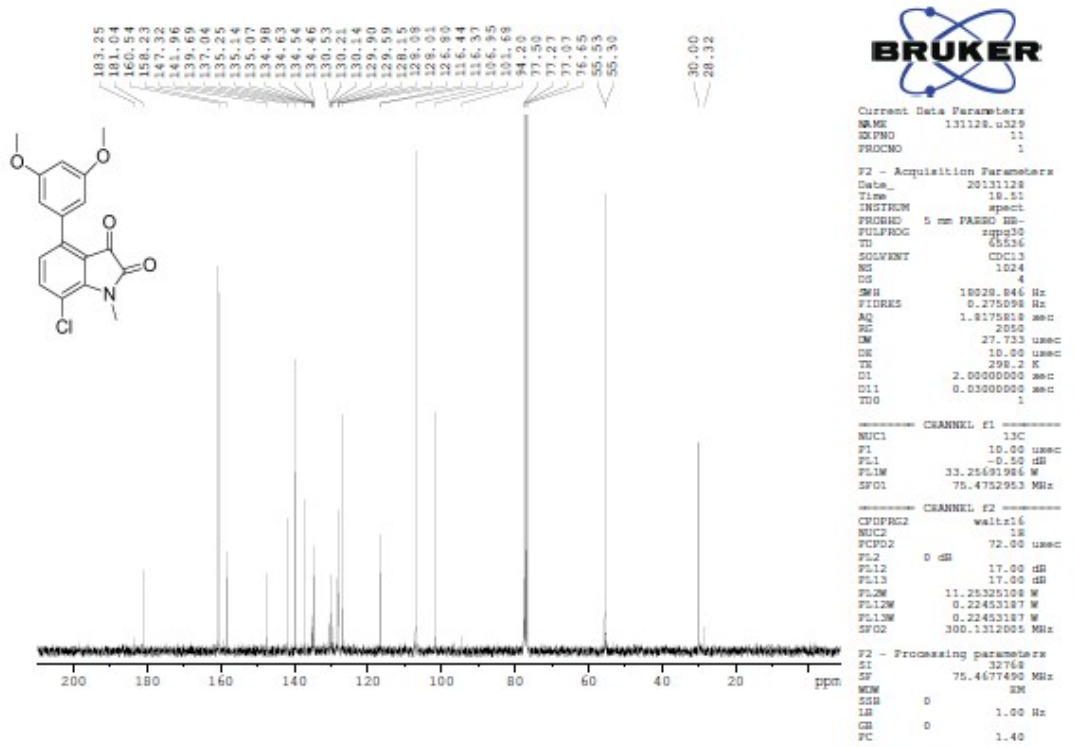

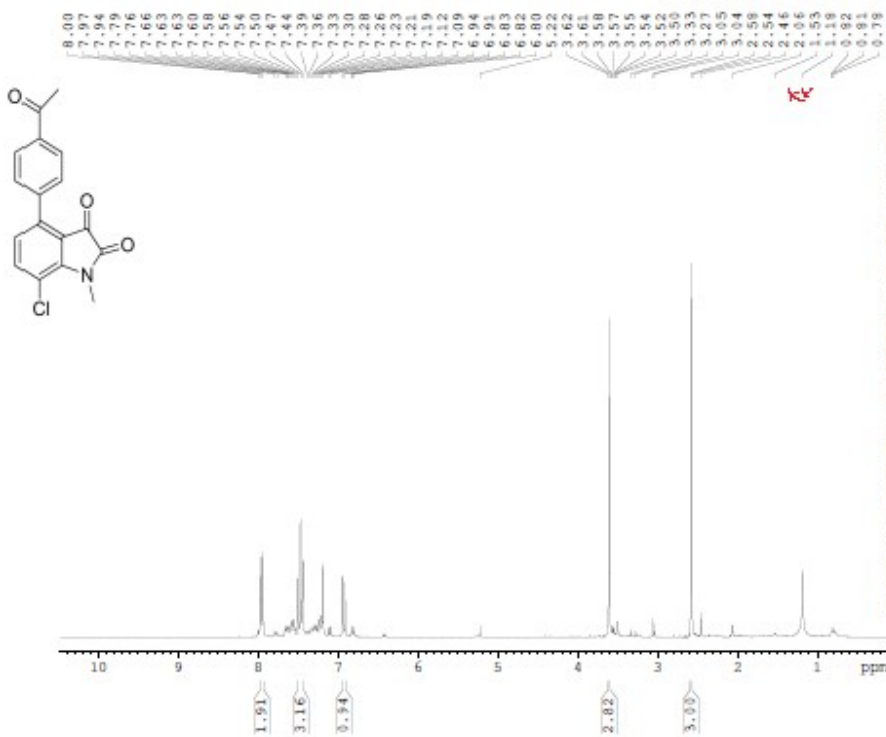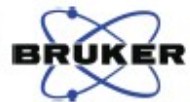

Current Data Parameters  
 NAME 131120.u329  
 EXPNO 10  
 PROCNO 1

F2 - Acquisition Parameters  
 Date\_ 20131120  
 Time 12.17  
 INSTRUM spect  
 PROBRD 5 mm PABBO BB-  
 PULPROG zg30  
 TD 65536  
 SOLVENT cdcl3  
 NS 16  
 DS 2  
 SWH 6188.119 Hz  
 FIDRES 0.094423 Hz  
 AQ 5.2953587 sec  
 RG 128  
 DM 80.800 usec  
 DE 10.00 usec  
 TE 298.2 K  
 D1 1.00000000 sec  
 TD0 1

CHANNEL F1  
 NUC1 1H  
 P1 10.00 usec  
 PL1 0 dB  
 PL1W 11.25325108 W  
 SFO1 300.1318534 MHz

F2 - Processing parameters  
 SI 32768  
 SF 300.1300330 MHz  
 WDM 8M  
 SSB 0  
 LB 0.30 Hz  
 GB 0  
 PC 1.00

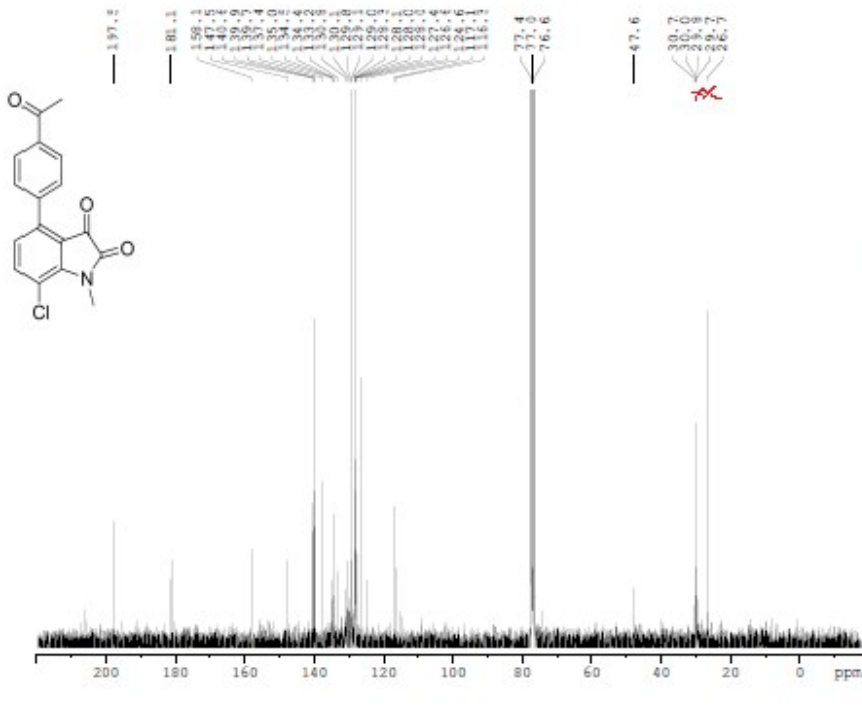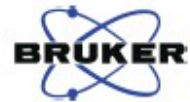

Current Data Parameters  
 NAME 131120.u329  
 EXPNO 11  
 PROCNO 1

F2 - Acquisition Parameters  
 Date\_ 20131121  
 Time 6.04  
 INSTRUM spect  
 PROBRD 5 mm PABBO BB-  
 PULPROG zgpg30  
 TD 65536  
 SOLVENT cdcl3  
 NS 1024  
 DS 4  
 SWH 18028.846 Hz  
 FIDRES 0.275098 Hz  
 AQ 1.8175818 sec  
 RG 2050  
 DM 27.733 usec  
 DE 10.00 usec  
 TE 298.2 K  
 D1 2.00000000 sec  
 D11 0.03000000 sec  
 TD0 1

CHANNEL F1  
 NUC1 13C  
 P1 10.00 usec  
 PL1 -0.50 dB  
 PL1W 33.25691986 W  
 SFO1 75.4752953 MHz

CHANNEL F2  
 CPDPRG2 waltz16  
 NUC2 1H  
 PCPD2 72.00 usec  
 PL2 0 dB  
 PL12 17.00 dB  
 PL13 17.00 dB  
 PL2W 11.25325108 W  
 PL12W 0.22453187 W  
 PL13W 0.22453187 W  
 SFO2 300.1312005 MHz

F2 - Processing parameters  
 SI 32768  
 SF 75.4677490 MHz  
 WDM 8M  
 SSB 0  
 LB 1.00 Hz  
 GB 0  
 PC 1.40

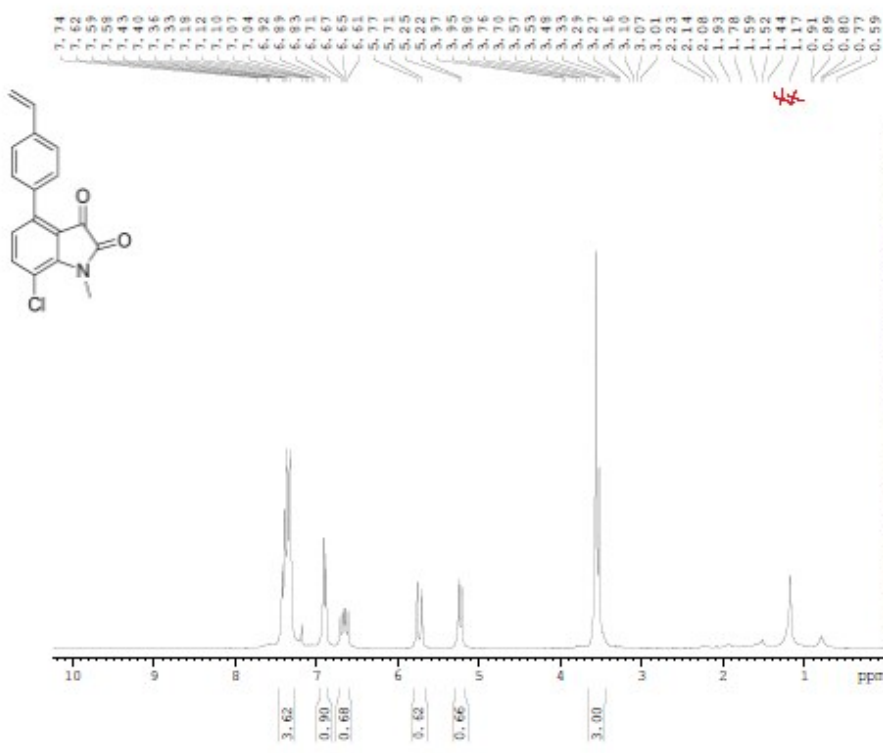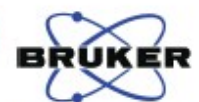

Current Data Parameters  
 NAME 131128.u304  
 EXPNO 10  
 PROCNO 1

F2 - Acquisition Parameters  
 Date\_ 2013128  
 Time 9.07  
 INSTRUM spect  
 PROBNM 5 mm FARGO BB-  
 PULPROG zg30  
 TD 65536  
 SOLVENT CDCl3  
 NS 16  
 DS 2  
 SWH 6188.119 Hz  
 FIDRES 0.034423 Hz  
 AQ 5.2953187 sec  
 RG 50.8  
 ZW 80.800 usec  
 DE 10.00 usec  
 TK 298.2 K  
 DI 1.00000000 sec  
 TDD 1

CHANNEL F1  
 NUC1 1H  
 P1 10.00 usec  
 PL1 0 dB  
 PL1W 11.25325108 W  
 SFO1 300.1318534 MHz

F2 - Processing parameters  
 SI 32768  
 SF 300.1300401 MHz  
 MDW 32K  
 SSB 0  
 LB 0.30 Hz  
 GB 0  
 PC 1.00

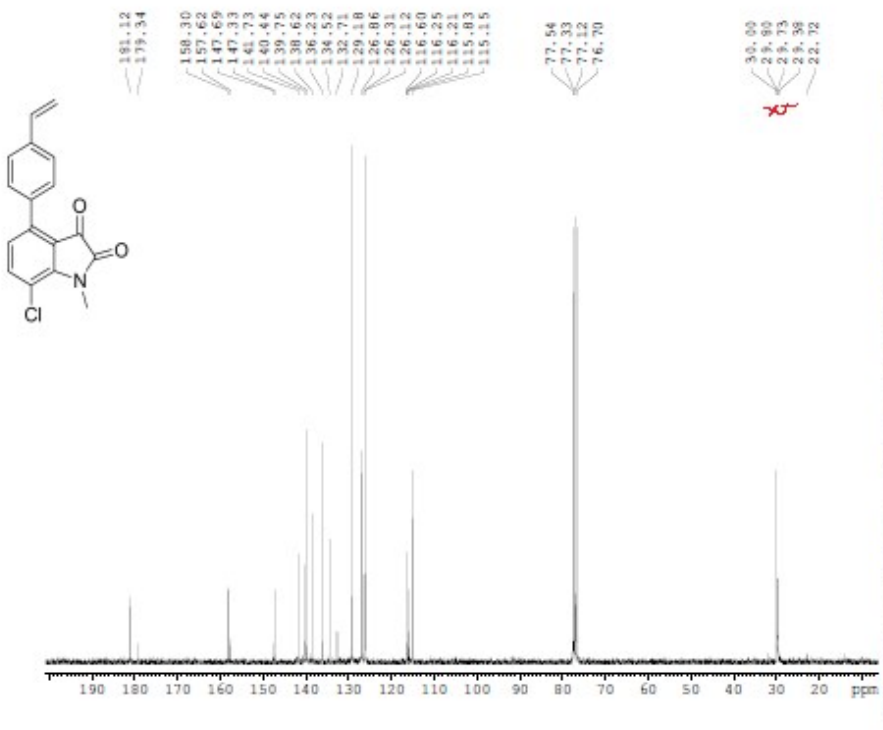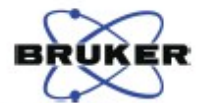

Current Data Parameters  
 NAME 131128.u304  
 EXPNO 12  
 PROCNO 1

F2 - Acquisition Parameters  
 Date\_ 2013128  
 Time 23.17  
 INSTRUM spect  
 PROBNM 5 mm FARGO BB-  
 PULPROG zgpg30  
 TD 65536  
 SOLVENT CDCl3  
 NS 1024  
 DS 4  
 SWH 10020.846 Hz  
 FIDRES 0.275098 Hz  
 AQ 1.8175818 sec  
 RG 2050  
 ZW 27.733 usec  
 DE 10.00 usec  
 TK 298.2 K  
 DI 2.00000000 sec  
 D11 0.03000000 sec  
 TDD 1

CHANNEL F1  
 NUC1 13C  
 P1 10.00 usec  
 PL1 -0.50 dB  
 PL1W 33.25692986 W  
 SFO1 75.4752953 MHz

CHANNEL F2  
 CPDPRG2 waltz16  
 NUC2 1H  
 PCPD2 72.00 usec  
 PL2 0 dB  
 PL12 17.00 dB  
 PL13 17.00 dB  
 PL1W 11.25325108 W  
 PL12W 0.22453187 W  
 PL13W 0.22453187 W  
 SFO2 300.1312005 MHz

F2 - Processing parameters  
 SI 32768  
 SF 75.4677490 MHz  
 MDW 32K  
 SSB 0  
 LB 1.00 Hz  
 GB 0  
 PC 1.40

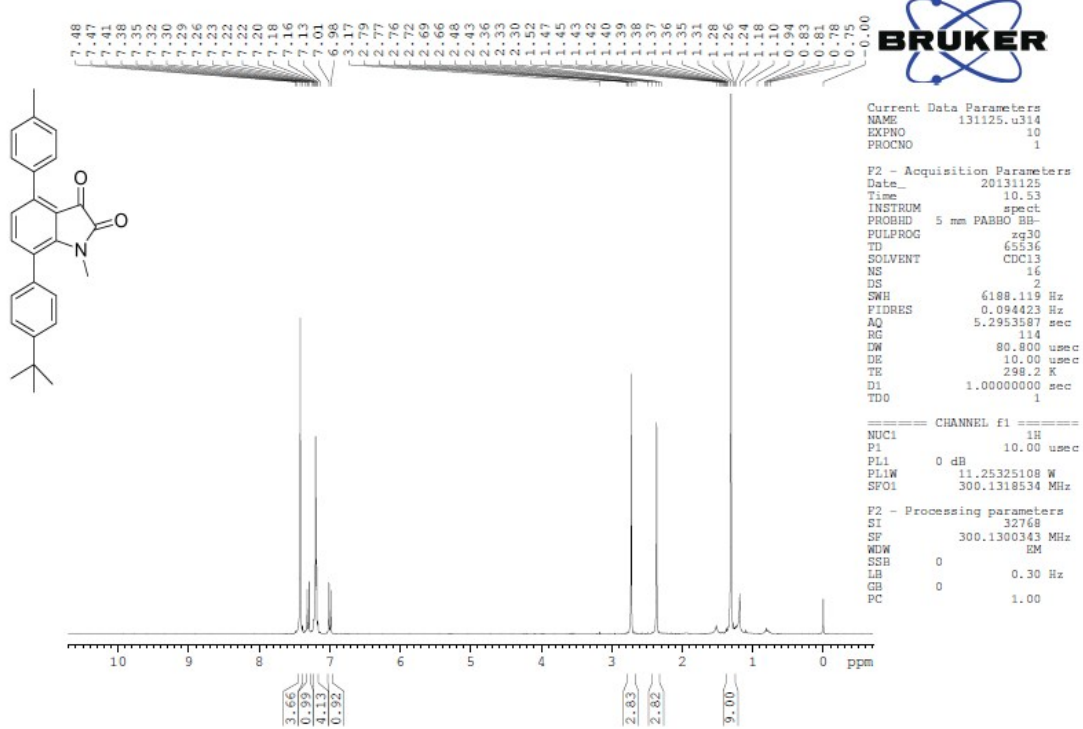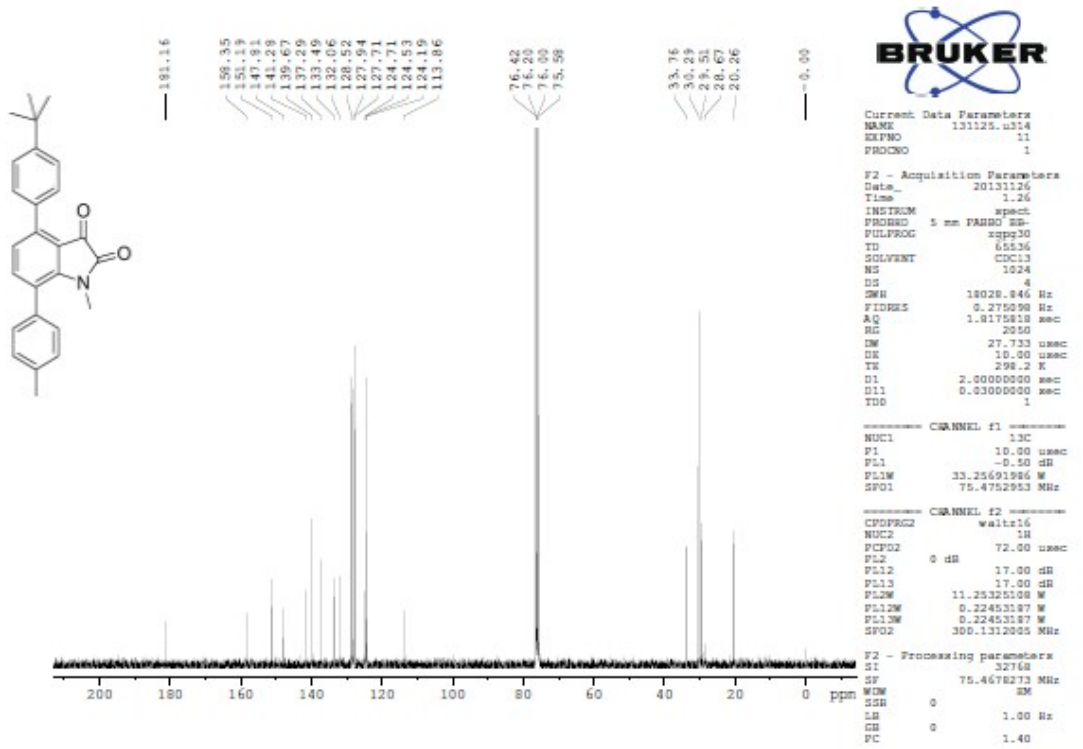

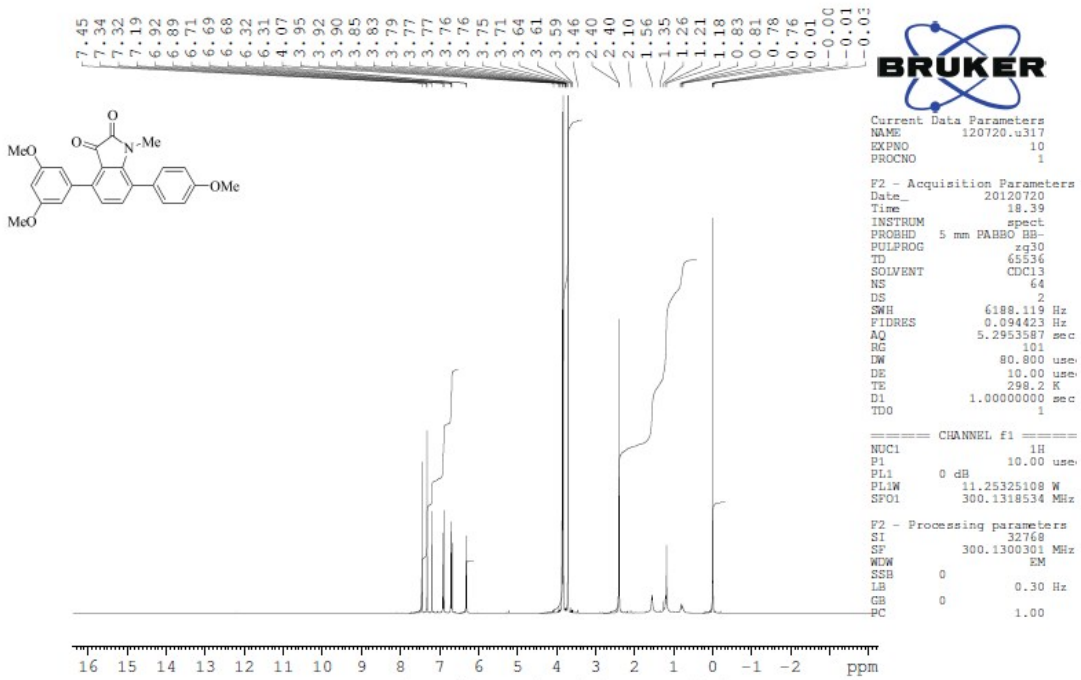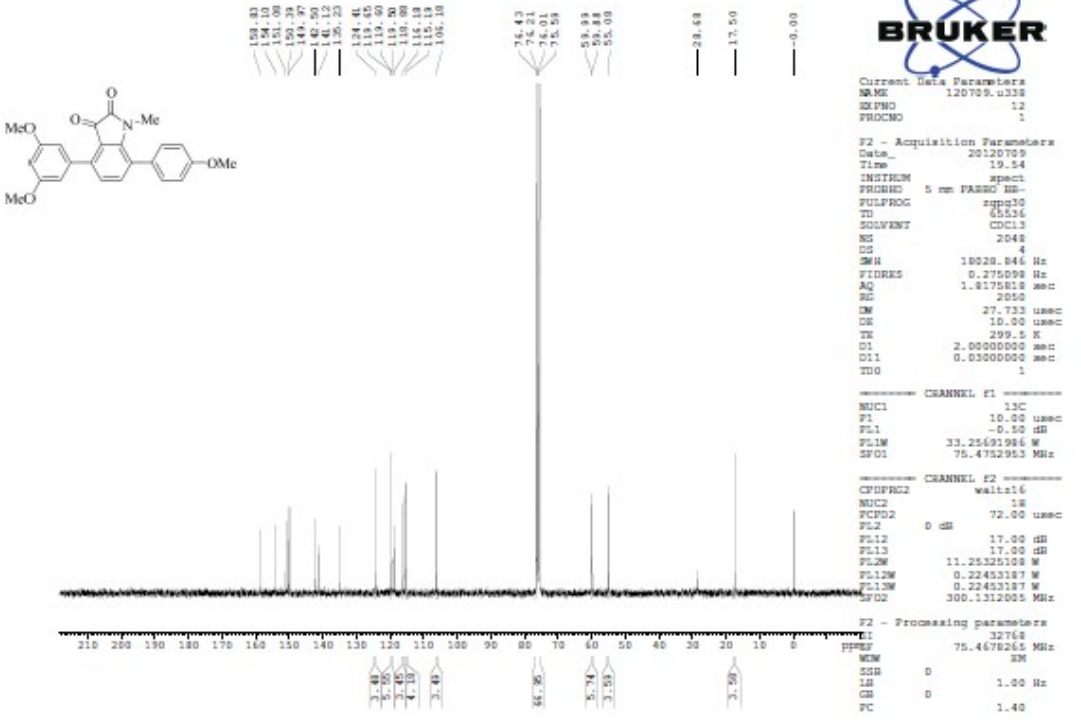

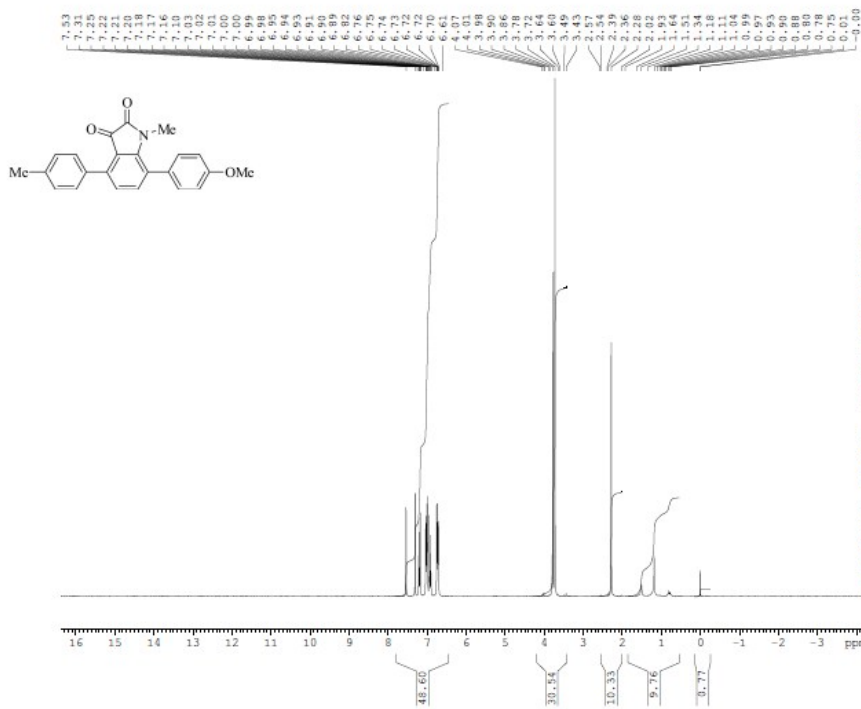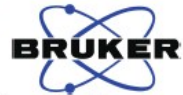

Current Data Parameters  
 NAME 121219.201  
 EXPNO 10  
 PROCNO 1

F2 - Acquisition Parameters  
 Date\_ 20121219  
 Time 8.03  
 INSTRUM spect  
 PROBHD 5 mm QNP 1H/13  
 PULPROG zg30  
 TD 65536  
 SOLVENT CDCl3  
 NS 16  
 DS 2  
 SWH 5165.289 Hz  
 FIDRES 0.078816 Hz  
 AQ 6.3439350 sec  
 RG 645  
 DW 96.800 usec  
 DE 10.00 usec  
 TE 298.2 K  
 D1 1.0000000 sec  
 TDO 1

===== CHANNEL f1 =====  
 NUC1 1H  
 P1 11.40 usec  
 PL1 -3.00 dB  
 SFO1 250.1315447 MHz

F2 - Processing parameters  
 SI 32768  
 SF 250.1300205 MHz  
 WIDW EM  
 SSB 0  
 LB 0.30 Hz  
 GB 0  
 PC 1.00

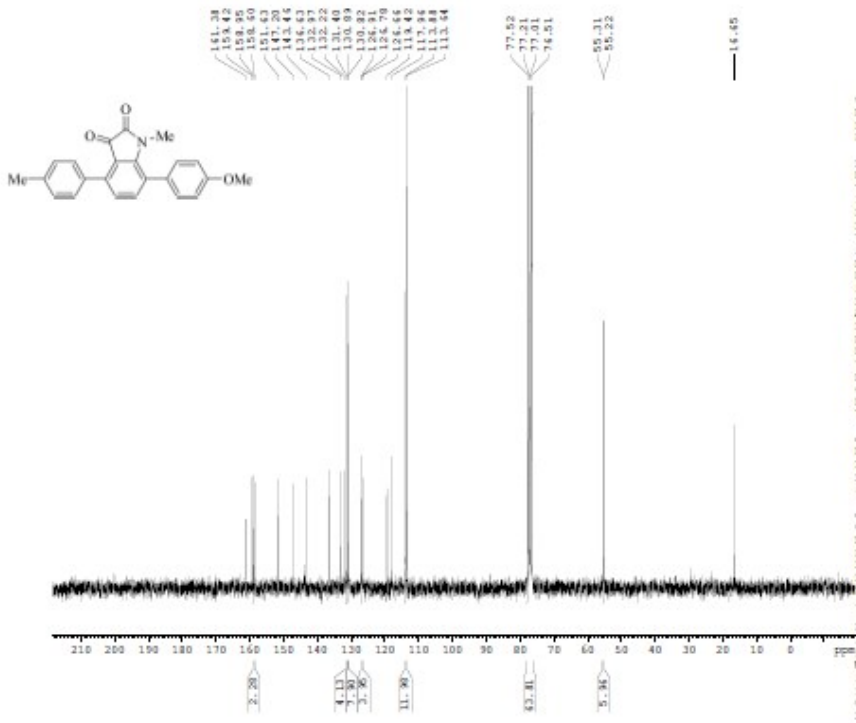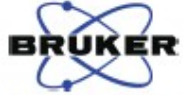

Current Data Parameters  
 NAME 121219.201  
 EXPNO 11  
 PROCNO 1

F2 - Acquisition Parameters  
 Date\_ 20121219  
 Time 9.47  
 INSTRUM spect  
 PROBHD 5 mm QNP 1H/13  
 PULPROG zgpg30  
 TD 65536  
 SOLVENT CDCl3  
 NS 1466  
 DS 4  
 SWH 15000.000 Hz  
 FIDRES 0.228882 Hz  
 AQ 2.1848334 sec  
 RG 2050  
 DW 33.333 usec  
 DE 10.00 usec  
 TE 298.2 K  
 D1 2.0000000 sec  
 d11 0.0300000 sec  
 DELTA 1.89999999 sec  
 TDO 1

===== CHANNEL f1 =====  
 NUC1 13C  
 P1 10.20 usec  
 PL1 0 dB  
 SFO1 62.9015280 MHz

===== CHANNEL f2 =====  
 CPDPRG2 waltz16  
 NUC2 1H  
 P2 70.00 usec  
 PL12 14.00 dB  
 PL13 14.00 dB  
 PL2 -3.00 dB  
 SFO2 250.1310005 MHz

F2 - Processing parameters  
 SI 32768  
 SF 62.8952390 MHz  
 WIDW EM  
 SSB 0  
 LB 1.00 Hz  
 GB 0  
 PC 1.40
